# Supplementary material
Source: PubMed Central journal article supplement (PMC3269549)
Supplement: NIHMS340044-supplement-1.pdf [file NIHMS340044-supplement-1.pdf]

Supplementary Figure 2

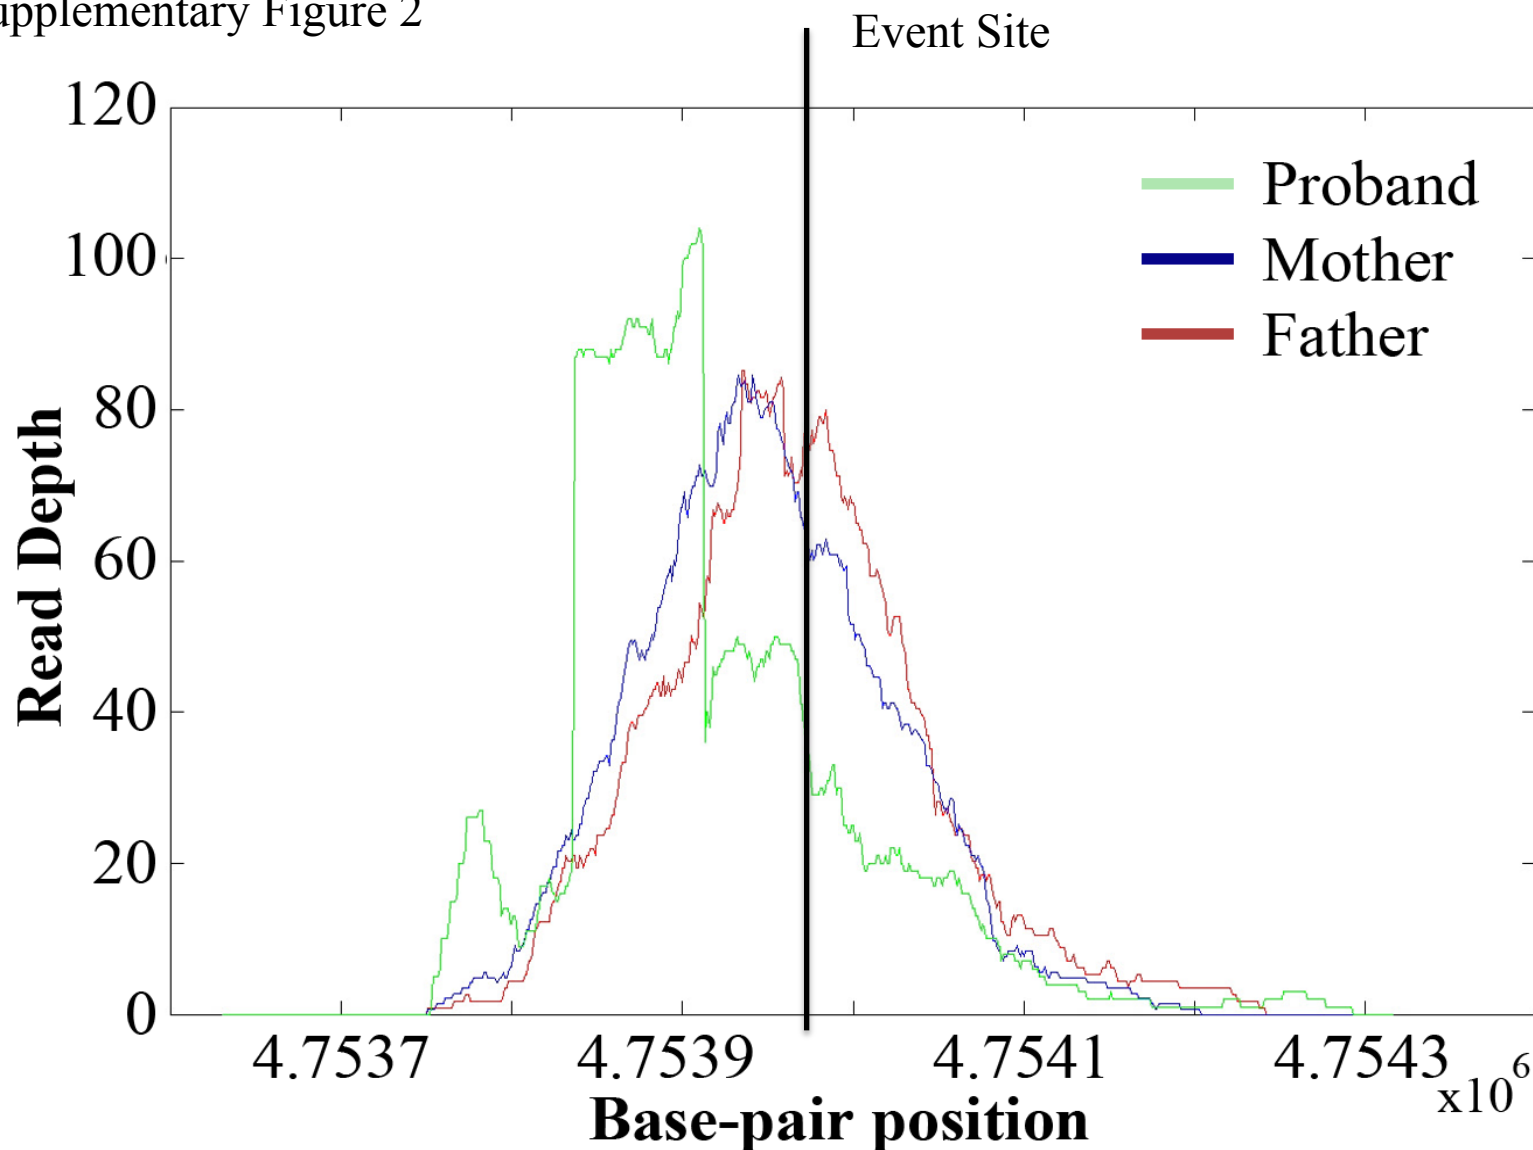

**Supplementary Figure 2. Read-depth filtering for *de novo* events.** A validated *de novo* insertion of 1 bp within *FOXP1* was detected by both SPLITREAD and BWA/GATK analyses. Sequence read-depth comparison of exon 9 of *FOXP1* for the mother (blue), father (red) and proband (green), shows a significant decrease in the read-depth in the proband when compared to parents corresponding to the insertion size. Note that the distribution of read-depth (mother and father) is not uniform over the exome.

**Supplementary Table 1: SPLITREAD Validation for the NA12891 exome.**

| Gene            | Event | Size | Sequence (6bp flanking)                                               | Chrom | Start     | End       | Perfect Support | Unbalanced Support | Status | Type |
|-----------------|-------|------|-----------------------------------------------------------------------|-------|-----------|-----------|-----------------|--------------------|--------|------|
| <i>SLC2A7*</i>  | Ins   | 11   | CCACCT <b>TTGTGCCACCT</b> TGTGCG                                      | chr1  | 9007616   | 9007626   | 7               | 5                  | Conf.  | Het. |
| <i>LCE4A</i>    | Ins   | 18   | TCTGGG <b>GGCTGCTGTAGCTCTGGG</b> GGCTGT                               | chr1  | 150948305 | 150948322 | 2               | 30                 | Conf.  | Hom. |
| <i>KCNMA1*</i>  | Ins   | 1    | TGCTTT <b>TTTTTTT</b>                                                 | chr10 | 78399792  | 78399792  | 3               | 11                 | FP     | NA   |
| <i>MKI67*</i>   | Del   | 2    | TGTGTG <b>TGTGTG</b>                                                  | chr10 | 129795112 | 129795115 | 3               | 3                  | FP     | NA   |
| <i>PHF21A*</i>  | Del   | 3    | ctgggc <b>gtgtgtgtg</b>                                               | chr11 | 45957943  | 45957947  | 3               | 62                 | FP     | NA   |
| <i>SLC22A9*</i> | Del   | 1    | CAGCAC <b>AAAAAAA</b>                                                 | chr11 | 62906256  | 62906258  | 2               | 8                  | Conf.  | Het. |
| <i>TDG*</i>     | Ins   | 1    | GAAAA <b>A</b> ATTACA                                                 | chr12 | 102897862 | 102897862 | 2               | 3                  | Conf.  | Het. |
| <i>NCOR2</i>    | Ins   | 3    | TGCTG <b>CTGTGCTGC</b>                                                | chr12 | 123453033 | 123453035 | 2               | 3                  | Conf.  | Hom. |
| <i>TSC22D1*</i> | Del   | 3    | gttgc <b>tgtgtgt</b>                                                  | chr13 | 44046694  | 44046698  | 2               | 4                  | FP     | NA   |
| <i>SLC35F5*</i> | Del   | 1    | AAAA <b>AA</b> AGCTAA                                                 | chr2  | 114216752 | 114216754 | 2               | 3                  | Conf.  | Hom. |
| <i>C21orf62</i> | Ins   | 1    | TGATTT <b>A</b> AAGGCT                                                | chr21 | 33088060  | 33088060  | 2               | 18                 | Conf.  | Het. |
| <i>TRAK1*</i>   | Ins   | 6    | GAGGAG <b>GAGGAG</b> GAGGAG                                           | chr3  | 42226590  | 42226595  | 2               | 7                  | Conf.  | Hom. |
| <i>YEATS2*</i>  | Del   | 3    | GCCggag <b>ggaggagga</b>                                              | chr3  | 184976441 | 184976445 | 2               | 19                 | Conf.  | Het. |
| <i>MAP3K1</i>   | Del   | 3    | caaca <b>caaca</b> caa                                                | chr5  | 56213619  | 56213623  | 21              | 5                  | Conf.  | Hom. |
| <i>COL14A1*</i> | Del   | 2    | TTTTTT <b>TT</b> TAGGAT                                               | chr8  | 121362338 | 121362341 | 2               | 3                  | Conf.  | Het. |
| <i>UBE2R2*</i>  | Del   | 3    | actgt <b>atgatgatg</b>                                                | chr9  | 33907211  | 33907215  | 2               | 5                  | FP     | NA   |
| <i>VCP*</i>     | Ins   | 1    | TTTTTT <b>T</b> TTGTGG                                                | chr9  | 35049653  | 35049653  | 2               | 3                  | FP     | NA   |
| <i>HRC</i>      | Ins   | 3    | TCATCA <b>TCA</b> TCATCA                                              | chr19 | 54349554  | 54349556  | 15              | 11                 | Conf.  | Het. |
| <i>HYDIN*</i>   | Del   | 15   | ctccag <b>gcgctccttccgt</b> gcgctc                                    | chr16 | 69512199  | 69512215  | 4               | 14                 | Conf.  | Het. |
| <i>KRTAP5*</i>  | Del   | 30   | TAAGCCT <b>TACTGCTGCCAGTCCAGCTGCTGT</b><br><b>AAGCC</b> TA <b>CTG</b> | chr11 | 1608186   | 1608217   | 4               | 5                  | Conf.  | Het. |
| <i>WDR66*</i>   | Ins   | 15   | AGGAGG <b>AGAAAGAGGAGGAGG</b> GGAAGG                                  | chr12 | 120843784 | 120843798 | 3               | 16                 | Conf.  | Het. |
| <i>MAP3K4*</i>  | Del   | 3    | gctgct <b>gctgctgct</b>                                               | chr6  | 161439369 | 161439373 | 2               | 7                  | Conf.  | Het. |
| <i>FERD3L*</i>  | Ins   | 3    | cctctt <b>cctc</b> ctcct                                              | chr7  | 19151287  | 19151289  | 2               | 6                  | Conf.  | Het. |
| <i>MEOX2*</i>   | Del   | 3    | tgatgg <b>tggtggtgg</b>                                               | chr7  | 15692325  | 15692329  | 2               | 3                  | Conf.  | Het. |

\*Variants were called exclusively by SPLITREAD but not by either PINDEL v0.2.0 or BWA/GATK. FP: false positive, Conf: confirmed, Hom: homozygous, Het: heterozygous

**Supplementary Table 2. The list of all structural variants and the frequency of these variants among 11 samples.**

| Chromosome | Start     | End       | Event    | Size  | Number of<br>Samples | Sample ID                                              | Genes                           |
|------------|-----------|-----------|----------|-------|----------------------|--------------------------------------------------------|---------------------------------|
| chr1       | 7812662   | 7812716   | Deletion | 54    | 1                    | NA18507                                                | <i>PER3</i>                     |
|            |           |           |          |       |                      | NA15510,NA18555,NA19240,N<br>A19129,NA18507,NA18956,NA |                                 |
| chr1       | 150938183 | 150948306 | Deletion | 10123 | 8                    | 12891,NA18517                                          | <i>LCE2A,LCE4A</i>              |
|            |           |           |          |       |                      | NA12891,NA19238,NA12878,N                              |                                 |
| chr1       | 150948293 | 151015622 | Deletion | 67329 | 6                    | A18517,NA18555,NA19240                                 | <i>LCE4A,C1orf68,KPRP,LCE1F</i> |
| chr1       | 229539561 | 229541839 | Deletion | 2278  | 3                    | NA18555,NA19129,NA12878                                | <i>EXOC8,C1orf124</i>           |
| chr10      | 124321939 | 124323340 | Deletion | 1401  | 1                    | NA18517                                                | <i>DMBT1</i>                    |
| chr11      | 1006690   | 1007869   | Deletion | 1179  | 2                    | NA12891,NA12892                                        | <i>MUC6</i>                     |
|            |           |           |          |       |                      | NA18517,NA19238,NA12891,N                              |                                 |
| chr11      | 1006701   | 1008387   | Deletion | 1686  | 4                    | A12892                                                 | <i>MUC6</i>                     |
| chr11      | 1006762   | 1007269   | Deletion | 507   | 1                    | NA12891                                                | <i>MUC6</i>                     |
| chr11      | 1006901   | 1007408   | Deletion | 507   | 2                    | NA12891,NA12892                                        | <i>MUC6</i>                     |
| chr11      | 1006991   | 1007501   | Deletion | 510   | 1                    | NA19238                                                | <i>MUC6</i>                     |
| chr11      | 1006994   | 1008176   | Deletion | 1182  | 2                    | NA19238,NA19240                                        | <i>MUC6</i>                     |
|            |           |           |          |       |                      | NA12878,NA18517,NA18956,N<br>A18507,NA18555,NA19238,NA |                                 |
| chr11      | 1007030   | 1007537   | Deletion | 507   | 7                    | 19240                                                  | <i>MUC6</i>                     |
| chr11      | 1007035   | 1007707   | Deletion | 672   | 2                    | NA12891,NA12892                                        | <i>MUC6</i>                     |
| chr11      | 1007037   | 1007544   | Deletion | 507   | 2                    | NA12891,NA12892                                        | <i>MUC6</i>                     |
| chr11      | 1007151   | 1007823   | Deletion | 672   | 1                    | NA12891                                                | <i>MUC6</i>                     |
| chr11      | 1007201   | 1007873   | Deletion | 672   | 1                    | NA12891                                                | <i>MUC6</i>                     |
| chr11      | 1007210   | 1008389   | Deletion | 1179  | 2                    | NA12891,NA12892                                        | <i>MUC6</i>                     |
| chr11      | 1007225   | 1007897   | Deletion | 672   | 2                    | NA12891,NA19238                                        | <i>MUC6</i>                     |
| chr11      | 1007300   | 1007972   | Deletion | 672   | 1                    | NA12891                                                | <i>MUC6</i>                     |
| chr11      | 1007312   | 1008491   | Deletion | 1179  | 2                    | NA12891,NA12892                                        | <i>MUC6</i>                     |
| chr11      | 1007367   | 1008039   | Deletion | 672   | 2                    | NA12891,NA19238                                        | <i>MUC6</i>                     |
| chr11      | 1007428   | 1008100   | Deletion | 672   | 1                    | NA12891                                                | <i>MUC6</i>                     |
| chr11      | 1007542   | 1007707   | Deletion | 165   | 2                    | NA12891,NA12892                                        | <i>MUC6</i>                     |
| chr11      | 1007661   | 1008171   | Deletion | 510   | 1                    | NA19238                                                | <i>MUC6</i>                     |
| chr11      | 1007771   | 1008278   | Deletion | 507   | 2                    | NA12891,NA12892                                        | <i>MUC6</i>                     |
| chr11      | 1007903   | 1008410   | Deletion | 507   | 2                    | NA12891,NA12892                                        | <i>MUC6</i>                     |
| chr11      | 1007987   | 1008494   | Deletion | 507   | 2                    | NA12891,NA12892                                        | <i>MUC6</i>                     |
| chr11      | 1082402   | 1082474   | Deletion | 72    | 1                    | NA18956                                                | <i>MUC2</i>                     |

|       |         |                  |     |                           |              |
|-------|---------|------------------|-----|---------------------------|--------------|
| chr11 | 1082491 | 1082629 Deletion | 138 | 2 NA12892,NA19129         | <i>MUC2</i>  |
| chr11 | 1082510 | 1082741 Deletion | 231 | 2 NA15510,NA19238         | <i>MUC2</i>  |
| chr11 | 1082513 | 1082627 Deletion | 114 | 1 NA19238                 | <i>MUC2</i>  |
| chr11 | 1082556 | 1082622 Deletion | 66  | 3 NA15510,NA19238,NA19240 | <i>MUC2</i>  |
| chr11 | 1082646 | 1082739 Deletion | 93  | 1 NA19129                 | <i>MUC2</i>  |
| chr11 | 1082675 | 1082744 Deletion | 69  | 1 NA18507                 | <i>MUC2</i>  |
| chr11 | 1082905 | 1083043 Deletion | 138 | 1 NA12892                 | <i>MUC2</i>  |
| chr11 | 1082957 | 1083170 Deletion | 213 | 1 NA19238                 | <i>MUC2</i>  |
| chr11 | 1082961 | 1083105 Deletion | 144 | 1 NA18555                 | <i>MUC2</i>  |
| chr11 | 1082961 | 1083243 Deletion | 282 | 3 NA18956,NA19238,NA18507 | <i>MUC2</i>  |
| chr11 | 1082967 | 1083318 Deletion | 351 | 1 NA19238                 | <i>MUC2</i>  |
| chr11 | 1083012 | 1083222 Deletion | 210 | 2 NA19238,NA19240         | <i>MUC2</i>  |
| chr11 | 1083027 | 1083585 Deletion | 558 | 2 NA19129,NA19238         | <i>MUC2</i>  |
| chr11 | 1083029 | 1083104 Deletion | 75  | 1 NA19238                 | <i>MUC2</i>  |
| chr11 | 1083037 | 1083319 Deletion | 282 | 1 NA19238                 | <i>MUC2</i>  |
|       |         |                  |     | NA15510,NA18507,NA19238,N |              |
| chr11 | 1083056 | 1083539 Deletion | 483 | 6 A18956,NA19129,NA12878  | <i>MUC2</i>  |
| chr11 | 1083101 | 1083590 Deletion | 489 | 2 NA19238,NA19129         | <i>MUC2</i>  |
| chr11 | 1083105 | 1083318 Deletion | 213 | 1 NA19238                 | <i>MUC2</i>  |
| chr11 | 1083149 | 1083221 Deletion | 72  | 1 NA19238                 | <i>MUC2</i>  |
| chr11 | 1083149 | 1083290 Deletion | 141 | 1 NA19238                 | <i>MUC2</i>  |
|       |         |                  |     | NA12891,NA12892,NA18555,N |              |
| chr11 | 1083165 | 1083510 Deletion | 345 | 4 A19238                  | <i>MUC2</i>  |
| chr11 | 1083245 | 1083320 Deletion | 75  | 1 NA19238                 | <i>MUC2</i>  |
| chr11 | 1083265 | 1083541 Deletion | 276 | 2 NA15510,NA19129         | <i>MUC2</i>  |
|       |         |                  |     | NA18517,NA12878,NA15510,N |              |
| chr11 | 1083400 | 1083538 Deletion | 138 | 4 A19129                  | <i>MUC2</i>  |
| chr11 | 1083441 | 1083510 Deletion | 69  | 1 NA12892                 | <i>MUC2</i>  |
|       |         |                  |     | NA19240,NA15510,NA18555,N |              |
|       |         |                  |     | A18956,NA19129,NA12878,NA |              |
| chr11 | 1083469 | 1083538 Deletion | 69  | 9 18507,NA19238,NA18517   | <i>MUC2</i>  |
|       |         |                  |     | NA18507,NA18517,NA19240,N |              |
| chr11 | 1083565 | 1083634 Deletion | 69  | 4 A19238                  | <i>MUC2</i>  |
|       |         |                  |     | NA19240,NA19129,NA18517,N |              |
|       |         |                  |     | A12892,NA12891,NA18507,NA |              |
|       |         |                  |     | 19238,NA12878,NA15510,NA1 |              |
| chr11 | 7673481 | 7673797 Deletion | 316 | 10 8555                   | <i>OVCH2</i> |

|       |           |           |          |        |                           |                                                                                                                                                                                                     |
|-------|-----------|-----------|----------|--------|---------------------------|-----------------------------------------------------------------------------------------------------------------------------------------------------------------------------------------------------|
| chr11 | 48223585  | 48303521  | Deletion | 79936  | 2 NA12891,NA12892         | <i>OR4X2,OR4X1,OR4S1,OR4C3</i>                                                                                                                                                                      |
| chr11 | 63082288  | 63114014  | Deletion | 31726  | 1 NA19238                 | <i>HRASLS2,PLA2G16</i>                                                                                                                                                                              |
| chr11 | 123625829 | 123640235 | Deletion | 14406  | 1 NA18517                 | <i>OR8G5,OR8G1</i>                                                                                                                                                                                  |
| chr11 | 133656586 | 133719596 | Deletion | 63010  | 2 NA12891,NA12892         | <i>GLB1L2,GLB1L3</i>                                                                                                                                                                                |
| chr12 | 11311591  | 11311718  | Deletion | 127    | 1 NA12891                 | <i>PRB3</i>                                                                                                                                                                                         |
| chr12 | 21087522  | 21241135  | Deletion | 153613 | 1 NA18517                 | <i>LST-3TM12,SLCO1B1</i>                                                                                                                                                                            |
| chr12 | 54956248  | 54962472  | Deletion | 6224   | 1 NA12892                 | <i>CS</i>                                                                                                                                                                                           |
| chr12 | 62465118  | 62482136  | Deletion | 17018  | 1 NA19238                 | <i>TMEM5</i>                                                                                                                                                                                        |
| chr12 | 102903637 | 102904856 | Deletion | 1219   | 3 NA12891,NA12892,NA19240 | <i>TDG</i>                                                                                                                                                                                          |
| chr12 | 107541480 | 107541840 | Deletion | 360    | 1 NA12891                 | <i>SELPLG</i>                                                                                                                                                                                       |
|       |           |           |          |        | NA12891,NA12878,NA18507,N |                                                                                                                                                                                                     |
| chr12 | 107541737 | 107541827 | Deletion | 90     | 4 A19238                  | <i>SELPLG</i>                                                                                                                                                                                       |
|       |           |           |          |        | NA15510,NA18956,NA12878,N |                                                                                                                                                                                                     |
| chr13 | 20627290  | 20627832  | Deletion | 542    | 4 A12891                  | <i>SKA3</i>                                                                                                                                                                                         |
| chr13 | 20627948  | 20630058  | Deletion | 2110   | 2 NA12878,NA18956         | <i>SKA3</i>                                                                                                                                                                                         |
| chr13 | 20630263  | 20632039  | Deletion | 1776   | 3 NA12878,NA15510,NA18956 | <i>SKA3</i>                                                                                                                                                                                         |
| chr13 | 20632128  | 20633930  | Deletion | 1802   | 1 NA18956                 | <i>SKA3</i>                                                                                                                                                                                         |
| chr13 | 20634015  | 20640127  | Deletion | 6112   | 3 NA12878,NA18956,NA12891 | <i>SKA3</i>                                                                                                                                                                                         |
| chr13 | 20640541  | 20644480  | Deletion | 3939   | 1 NA15510                 | <i>SKA3</i>                                                                                                                                                                                         |
| chr13 | 20644642  | 20648512  | Deletion | 3870   | 2 NA15510,NA12878         | <i>MRP63,SKA3</i>                                                                                                                                                                                   |
| chr13 | 23278207  | 23281987  | Deletion | 3780   | 2 NA18555,NA19240         | <i>MIPEP</i>                                                                                                                                                                                        |
| chr13 | 44421975  | 44431517  | Deletion | 9542   | 2 NA12891,NA12892         | <i>NUFIP1</i>                                                                                                                                                                                       |
| chr14 | 92530100  | 92552778  | Deletion | 22678  | 3 NA12878,NA12892,NA19129 | <i>ITPK1</i>                                                                                                                                                                                        |
| chr16 | 3194465   | 3205829   | Deletion | 11364  | 1 NA18517                 | <i>OR1F2P,OR1F1</i>                                                                                                                                                                                 |
| chr17 | 1358937   | 1359228   | Deletion | 291    | 1 NA12892                 | <i>INPP5K</i>                                                                                                                                                                                       |
| chr17 | 1358988   | 1359223   | Deletion | 235    | 1 NA12891                 | <i>INPP5K</i>                                                                                                                                                                                       |
| chr17 | 1359104   | 1359227   | Deletion | 123    | 1 NA12878                 | <i>INPP5K</i>                                                                                                                                                                                       |
|       |           |           |          |        |                           | <i>USH1G,ICT1,NT5C,MRPS7,LOC100287042,LOC643008,LOC100130933,OTOP2,OTOP3,C17orf28,CDR2L,ATP5H,KCTD2,SLC16A5,ARMC7,SUMO2,NUP85,GGA3,SLC25A19,KIAA0195,CASKIN2,TSEN54,MYO15B,SAP30BP,ITGB4,HN1,MI</i> |
| chr17 | 70424628  | 71262644  | Deletion | 838016 | 2 NA19238,NA18956         | <i>F4GD,GRB2,LLGL2,RECQL5</i>                                                                                                                                                                       |
| chr18 | 74957635  | 74971340  | Deletion | 13705  | 1 NA19238                 | <i>ATP9B</i>                                                                                                                                                                                        |
| chr19 | 1562849   | 1566284   | Deletion | 3435   | 1 NA12878                 | <i>TCF3</i>                                                                                                                                                                                         |
| chr19 | 4462139   | 4462931   | Deletion | 792    | 1 NA18555                 | <i>PLIN4</i>                                                                                                                                                                                        |
|       |           |           |          |        | NA19238,NA19240,NA18507,N |                                                                                                                                                                                                     |
| chr19 | 4462506   | 4462605   | Deletion | 99     | 4 A19129                  | <i>PLIN4</i>                                                                                                                                                                                        |

|       |           |                    |       |                           |                       |
|-------|-----------|--------------------|-------|---------------------------|-----------------------|
| chr19 | 4462551   | 4462749 Deletion   | 198   | 2 NA12891,NA12892         | <i>PLIN4</i>          |
| chr19 | 4463228   | 4463525 Deletion   | 297   | 1 NA18956                 | <i>PLIN4</i>          |
| chr19 | 8863577   | 8869249 Deletion   | 5672  | 1 NA12891                 | <i>MUC16</i>          |
| chr19 | 8870620   | 8879469 Deletion   | 8849  | 2 NA12891,NA12892         | <i>MUC16</i>          |
|       |           |                    |       | NA18956,NA12878,NA12892,N |                       |
|       |           |                    |       | A15510,NA18555,NA12891,NA |                       |
| chr19 | 8876428   | 8879241 Deletion   | 2813  | 7 18517                   | <i>MUC16</i>          |
| chr19 | 8882082   | 8894638 Deletion   | 12556 | 1 NA12892                 | <i>MUC16</i>          |
|       |           |                    |       | NA15510,NA19238,NA18517,N |                       |
| chr19 | 14813206  | 14875502 Deletion  | 62296 | 5 A19240,NA18956          | <i>OR7A10,OR7A17</i>  |
| chr19 | 14813472  | 14852950 Deletion  | 39478 | 1 NA12892                 | <i>OR7A10,OR7A17</i>  |
|       |           |                    |       | NA12891,NA15510,NA18507,N |                       |
| chr19 | 15591497  | 15619058 Deletion  | 27561 | 6 A18555,NA18956,NA19238  | <i>CYP4F3,CYP4F8</i>  |
| chr19 | 15594062  | 15621003 Deletion  | 26941 | 1 NA12892                 | <i>CYP4F3,CYP4F8</i>  |
| chr19 | 15624610  | 15656855 Deletion  | 32245 | 3 NA18956,NA18517,NA19238 | <i>CYP4F3,CYP4F12</i> |
|       |           |                    |       | NA12891,NA18956,NA12878,N |                       |
| chr19 | 40694203  | 40694254 Deletion  | 51    | 5 A18555,NA15510          | <i>DMKN</i>           |
| chr19 | 57808757  | 57808841 Deletion  | 84    | 1 NA12891                 | <i>ZNF83</i>          |
| chr2  | 31214381  | 31214480 Deletion  | 99    | 1 NA18507                 | <i>GALNT14</i>        |
| chr2  | 111470015 | 111470069 Deletion | 54    | 2 NA19129,NA18517         | <i>ACOXL</i>          |
| chr2  | 179005228 | 179009118 Deletion | 3890  | 2 NA18956,NA18555         | <i>PRKRA,MIR548N</i>  |
| chr2  | 179014678 | 179016240 Deletion | 1562  | 1 NA18956                 | <i>PRKRA,MIR548N</i>  |
| chr2  | 179020558 | 179023213 Deletion | 2655  | 2 NA18956,NA18555         | <i>PRKRA,MIR548N</i>  |
| chr2  | 179023385 | 179023939 Deletion | 554   | 2 NA18956,NA18555         | <i>PRKRA,MIR548N</i>  |
| chr2  | 227902745 | 227903587 Deletion | 842   | 1 NA19238                 | <i>MFF</i>            |
| chr2  | 240630131 | 240630859 Deletion | 728   | 2 NA15510,NA19238         | <i>PRR21</i>          |
| chr2  | 240630785 | 240630897 Deletion | 112   | 1 NA19238                 | <i>PRR21</i>          |
| chr2  | 240630841 | 240630897 Deletion | 56    | 2 NA18555,NA19238         | <i>PRR21</i>          |
| chr20 | 3684250   | 3687183 Deletion   | 2933  | 1 NA18507                 | <i>C20orf27</i>       |
|       |           |                    |       | NA18507,NA18517,NA18555,N |                       |
|       |           |                    |       | A18956,NA19238,NA15510,NA |                       |
| chr20 | 23494625  | 23532272 Deletion  | 37647 | 7 19129                   | <i>CST9,CST9L</i>     |
|       |           |                    |       | NA15510,NA18507,NA18555,N |                       |
| chr20 | 48034298  | 48037818 Deletion  | 3520  | 4 A19238                  | <i>SNAIL</i>          |
| chr21 | 31036424  | 31041217 Deletion  | 4793  | 1 NA18956                 | <i>KRTAP21-2</i>      |
| chr22 | 28493537  | 28495666 Deletion  | 2129  | 3 NA12878,NA15510,NA19129 | <i>UQCR10</i>         |

|       |           |           |          |                           |                                        |
|-------|-----------|-----------|----------|---------------------------|----------------------------------------|
|       |           |           |          | NA12878,NA15510,NA18555,N |                                        |
| chr22 | 36449831  | 36450128  | Deletion | 297                       | 5 A18956,NA19238 <i>TRIOBP</i>         |
| chr3  | 110529562 | 110530427 | Deletion | 865                       | 3 NA18517,NA19240,NA18555 <i>DPPA4</i> |
| chr3  | 198977721 | 199046923 | Deletion | 69202                     | 1 NA19129 <i>LRCH3,FYTTDI</i>          |
| chr4  | 1378351   | 1379400   | Deletion | 1049                      | 1 NA12891 <i>CRIPAK</i>                |
| chr4  | 1378351   | 1378442   | Deletion | 91                        | 2 NA12891,NA12892 <i>CRIPAK</i>        |
| chr4  | 1378390   | 1378516   | Deletion | 126                       | 2 NA18507,NA15510 <i>CRIPAK</i>        |
| chr4  | 1378394   | 1378612   | Deletion | 218                       | 1 NA18507 <i>CRIPAK</i>                |
| chr4  | 1378398   | 1379048   | Deletion | 650                       | 1 NA19238 <i>CRIPAK</i>                |
| chr4  | 1378544   | 1379099   | Deletion | 555                       | 2 NA19238,NA19240 <i>CRIPAK</i>        |
| chr4  | 1378553   | 1379048   | Deletion | 495                       | 2 NA19238,NA19240 <i>CRIPAK</i>        |
| chr4  | 1378573   | 1379279   | Deletion | 706                       | 1 NA19238 <i>CRIPAK</i>                |
| chr4  | 1378613   | 1378983   | Deletion | 370                       | 1 NA12892 <i>CRIPAK</i>                |
| chr4  | 1378638   | 1379223   | Deletion | 585                       | 2 NA15510,NA18507 <i>CRIPAK</i>        |
| chr4  | 1378643   | 1379384   | Deletion | 741                       | 1 NA19238 <i>CRIPAK</i>                |
| chr4  | 1379073   | 1379382   | Deletion | 309                       | 2 NA19240,NA19238 <i>CRIPAK</i>        |
| chr4  | 12979377  | 12987271  | Deletion | 7894                      | 1 NA18555 <i>RAB28</i>                 |
| chr4  | 88754707  | 88755496  | Deletion | 789                       | 1 NA12891 <i>DSPP</i>                  |
| chr4  | 88755030  | 88755783  | Deletion | 753                       | 1 NA12892 <i>DSPP</i>                  |
| chr4  | 88755086  | 88755485  | Deletion | 399                       | 2 NA12891,NA12892 <i>DSPP</i>          |
| chr4  | 88755161  | 88755488  | Deletion | 327                       | 2 NA12891,NA12892 <i>DSPP</i>          |
| chr4  | 88755174  | 88755483  | Deletion | 309                       | 1 NA18555 <i>DSPP</i>                  |
| chr4  | 88755376  | 88756348  | Deletion | 972                       | 1 NA12891 <i>DSPP</i>                  |
| chr4  | 88755467  | 88755794  | Deletion | 327                       | 1 NA12891 <i>DSPP</i>                  |
| chr4  | 88755489  | 88756518  | Deletion | 1029                      | 1 NA18555 <i>DSPP</i>                  |
| chr4  | 88755871  | 88755952  | Deletion | 81                        | 1 NA19238 <i>DSPP</i>                  |
| chr4  | 88756068  | 88756239  | Deletion | 171                       | 1 NA12891 <i>DSPP</i>                  |
| chr4  | 88756068  | 88756158  | Deletion | 90                        | 1 NA12891 <i>DSPP</i>                  |
| chr4  | 88756074  | 88756452  | Deletion | 378                       | 1 NA12892 <i>DSPP</i>                  |
| chr4  | 88756077  | 88756176  | Deletion | 99                        | 1 NA12892 <i>DSPP</i>                  |
| chr4  | 88756088  | 88756376  | Deletion | 288                       | 1 NA19238 <i>DSPP</i>                  |
| chr4  | 88756090  | 88756549  | Deletion | 459                       | 1 NA18517 <i>DSPP</i>                  |
| chr4  | 88756092  | 88756281  | Deletion | 189                       | 2 NA12892,NA19238 <i>DSPP</i>          |
|       |           |           |          | NA19238,NA19240,NA18517,N |                                        |
| chr4  | 88756092  | 88756164  | Deletion | 72                        | 4 A19129 <i>DSPP</i>                   |
|       |           |           |          | NA19240,NA18507,NA19129,N |                                        |
| chr4  | 88756093  | 88756552  | Deletion | 459                       | 4 A12892 <i>DSPP</i>                   |

|      |           |           |          |                           |                                               |
|------|-----------|-----------|----------|---------------------------|-----------------------------------------------|
|      |           |           |          | NA18507,NA19240,NA15510,N |                                               |
| chr4 | 88756095  | 88756149  | Deletion | 54                        | 6 A18517,NA12891,NA12892 <i>DSPP</i>          |
| chr4 | 88756096  | 88756348  | Deletion | 252                       | 1 NA19238 <i>DSPP</i>                         |
| chr4 | 88756104  | 88756239  | Deletion | 135                       | 1 NA12892 <i>DSPP</i>                         |
| chr4 | 88756188  | 88756395  | Deletion | 207                       | 1 NA12892 <i>DSPP</i>                         |
| chr4 | 88756200  | 88756263  | Deletion | 63                        | 1 NA12891 <i>DSPP</i>                         |
| chr4 | 88756248  | 88756545  | Deletion | 297                       | 1 NA12891 <i>DSPP</i>                         |
| chr4 | 88756302  | 88756455  | Deletion | 153                       | 1 NA12891 <i>DSPP</i>                         |
| chr5 | 54599405  | 54600995  | Deletion | 1590                      | 3 NA15510,NA18555,NA18956 <i>DHX29</i>        |
| chr5 | 115258757 | 115266483 | Deletion | 7726                      | 1 NA12891 <i>AP3SI</i>                        |
| chr5 | 115266587 | 115276956 | Deletion | 10369                     | 2 NA15510,NA19240 <i>AP3SI</i>                |
|      |           |           |          | NA12878,NA18517,NA18956,N |                                               |
| chr5 | 141334703 | 141338050 | Deletion | 3347                      | 6 A18555,NA19129,NA19238 <i>RNF14</i>         |
| chr5 | 172967904 | 172968849 | Deletion | 945                       | 1 NA19238 <i>BOD1</i>                         |
| chr5 | 172969042 | 172972738 | Deletion | 3696                      | 1 NA18517 <i>BOD1</i>                         |
| chr6 | 31713081  | 31713202  | Deletion | 121                       | 1 NA18956 <i>BAT2</i>                         |
| chr6 | 32030339  | 32030465  | Deletion | 126                       | 1 NA12878 <i>RDBP</i>                         |
| chr6 | 73976167  | 73990727  | Deletion | 14560                     | 2 NA18507,NA12878 <i>KHDC1L</i>               |
|      |           |           |          | NA15510,NA18517,NA18555,N |                                               |
|      |           |           |          | A19129,NA19238,NA19240,NA |                                               |
| chr6 | 136624309 | 136630993 | Deletion | 6684                      | 8 12892,NA12891 <i>BCLAF1</i>                 |
|      |           |           |          | NA12878,NA12892,NA18555,N |                                               |
| chr6 | 136631171 | 136632268 | Deletion | 1097                      | 6 A19240,NA18507,NA19238 <i>BCLAF1</i>        |
| chr6 | 136632446 | 136634828 | Deletion | 2382                      | 1 NA18555 <i>BCLAF1</i>                       |
| chr7 | 23318993  | 23319666  | Deletion | 673                       | 1 NA12891 <i>IGF2BP3</i>                      |
| chr7 | 44840688  | 44841654  | Deletion | 966                       | 1 NA12892 <i>H2AFV</i>                        |
| chr7 | 99299326  | 99301499  | Deletion | 2173                      | 3 NA19238,NA18517,NA19240 <i>CYP3A43</i>      |
| chr7 | 100467080 | 100467257 | Deletion | 177                       | 1 NA12892 <i>MUC17</i>                        |
| chr7 | 100468652 | 100469006 | Deletion | 354                       | 1 NA12892 <i>MUC17</i>                        |
| chr8 | 12884556  | 12996561  | Deletion | 112005                    | 1 NA18555 <i>C8orf79,DLC1</i>                 |
| chr8 | 23051637  | 23110581  | Deletion | 58944                     | 1 NA19238 <i>TNFRSF10A,TNFRSF10D</i>          |
| chr8 | 30040974  | 30043048  | Deletion | 2074                      | 1 NA12891 <i>TMEM66</i>                       |
| chr8 | 30043198  | 30043835  | Deletion | 637                       | 1 NA12891 <i>TMEM66</i>                       |
| chr8 | 73130654  | 73305266  | Deletion | 174612                    | 1 NA12878 <i>LOC392232,LOC100132891,TRPA1</i> |
|      |           |           |          | NA18517,NA19238,NA12878,N |                                               |
|      |           |           |          | A15510,NA18507,NA18956,NA |                                               |
| chr9 | 19050220  | 19053004  | Deletion | 2784                      | 7 12891 <i>HAUS6</i>                          |

|              |           |           |          |       |                           |                 |
|--------------|-----------|-----------|----------|-------|---------------------------|-----------------|
| chr9         | 19060300  | 19066601  | Deletion | 6301  | 1 NA19238                 | <i>HAUS6</i>    |
|              |           |           |          |       | NA12878,NA12891,NA12892,N |                 |
|              |           |           |          |       | A15510,NA18507,NA18517,NA |                 |
| chr9         | 19066703  | 19068174  | Deletion | 1471  | 8 18555,NA19238           | <i>HAUS6</i>    |
|              |           |           |          |       | NA15510,NA19238,NA12891,N |                 |
|              |           |           |          |       | A18507,NA18555,NA19240,NA |                 |
|              |           |           |          |       | 12878,NA12892,NA18517,NA1 |                 |
| chr9         | 19068296  | 19070472  | Deletion | 2176  | 11 8956,NA19129           | <i>HAUS6</i>    |
|              |           |           |          |       | NA12892,NA12891,NA18507,N |                 |
|              |           |           |          |       | A18517,NA12878,NA18555,NA |                 |
| chr9         | 19070668  | 19072868  | Deletion | 2200  | 8 18956,NA19129           | <i>HAUS6</i>    |
| chr9         | 19073046  | 19076736  | Deletion | 3690  | 2 NA12891,NA12892         | <i>HAUS6</i>    |
|              |           |           |          |       | NA12891,NA19129,NA12878,N |                 |
| chr9         | 19083300  | 19084313  | Deletion | 1013  | 5 A19240,NA18555          | <i>HAUS6</i>    |
| chr9         | 107496875 | 107507699 | Deletion | 10824 | 1 NA15510                 | <i>TMEM38B</i>  |
| chr9         | 107523826 | 107524638 | Deletion | 812   | 1 NA15510                 | <i>TMEM38B</i>  |
|              |           |           |          |       | NA15510,NA18555,NA18956,N |                 |
| chr9         | 131633169 | 131633996 | Deletion | 827   | 4 A19129                  | <i>C9orf78</i>  |
|              |           |           |          |       | NA12892,NA15510,NA18507,N |                 |
| chr9         | 139892491 | 139893327 | Deletion | 836   | 5 A18517,NA19240          | <i>CACNA1B</i>  |
|              |           |           |          |       | NA18956,NA12891,NA12878,N |                 |
| chr9         | 139893431 | 139897015 | Deletion | 3584  | 4 A12892                  | <i>CACNA1B</i>  |
| chrX         | 56312648  | 56313340  | Deletion | 692   | 1 NA19240                 | <i>KLF8</i>     |
| chr17_random | 311953    | 312091    | Deletion | 138   | 1 NA18507                 | <i>KRTAP1-1</i> |

**Supplementary Table 3: Summary for SPLITREAD analysis of 11 HapMap Exomes**

| Sample ID | Data          | Coverage | Total Number<br>of Calls | INDELs | Structural<br>Variants | 1000G<br>Intersection | dbSNP<br>Intersection |        |        |
|-----------|---------------|----------|--------------------------|--------|------------------------|-----------------------|-----------------------|--------|--------|
| NA12878   | 50PE          | 234.23   | 308                      | 277    | 31                     | 188                   | 67.87%                | 211    | 76.17% |
| NA12891   | 76PE          | 170.7    | 276                      | 213    | 63                     | 148                   | 69.48%                | 154    | 72.30% |
| NA12892   | 76PE          | 262.84   | 272                      | 220    | 52                     | 142                   | 64.55%                | 155    | 70.45% |
| NA15510   | 50PE          | 220.76   | 308                      | 274    | 34                     | NA                    | NA                    | 206    | 75.18% |
| NA18507   | 50PE          | 247.45   | 353                      | 324    | 29                     | 202                   | 62.35%                | 215    | 66.36% |
| NA18517   | 50PE          | 244.11   | 354                      | 324    | 30                     | 205                   | 63.27%                | 218    | 67.28% |
| NA18555   | 50PE          | 300.5    | 349                      | 313    | 36                     | 201                   | 64.22%                | 215    | 68.69% |
| NA18956   | 50PE          | 215.38   | 297                      | 264    | 33                     | 195                   | 73.86%                | 199    | 75.38% |
| NA19129   | 50PE          | 228.91   | 347                      | 323    | 24                     | 219                   | 67.80%                | 226    | 69.97% |
| NA19238   | 50PE          | 268.44   | 367                      | 302    | 65                     | 218                   | 72.19%                | 204    | 67.55% |
| NA19240   | 50PE          | 216.67   | 348                      | 320    | 28                     | 239                   | 74.69%                | 210    | 65.63% |
| Average   | 9 50PE:2 76PE | 237.27   | 325.36                   | 286.73 | 38.64                  | 195.7                 | 68.03%                | 201.18 | 70.45% |

Calls were made only within coding region (CDS) portion excluding duplicated genes and known processed pseudogenes. The indels are required to be within 10bp of each other and the size of the events is required to be exactly the same.

**Supplementary Table 4. Analysis of the 63 individuals from autism trio data.**

| <b>Samples</b> | <b>Coverage</b> | <b>Thresholds<br/>(Perfect/Unbalanced)</b> | <b>INDELs<br/>(≤50 bp)</b> | <b>Structural<br/>Variants (&gt;50 bp)</b> |
|----------------|-----------------|--------------------------------------------|----------------------------|--------------------------------------------|
| 11048.fa       | 262.36          |                                            | 2,2                        | 123                                        |
| 11048.mo       | 277.97          |                                            | 2,2                        | 133                                        |
| 11048.p1       | 211.13          | 1,11                                       | 84                         | 7                                          |
| 11307.fa       | 165.12          | 1,5                                        | 256                        | 5                                          |
| 11307.mo       | 164.08          | 1,5                                        | 207                        | 22                                         |
| 11307.p1       | 203.22          | 1,10                                       | 118                        | 11                                         |
| 11580.fa       | 188.44          | 1,8                                        | 207                        | 20                                         |
| 11580.mo       | 185.11          | 1,8                                        | 258                        | 29                                         |
| 11580.p1       | 175.95          | 1,7                                        | 229                        | 16                                         |
| 11666.fa       | 192.81          | 1,9                                        | 229                        | 443                                        |
| 11666.mo       | 201.97          | 1,10                                       | 418                        | 675                                        |
| 11666.p1       | 171.16          | 1,6                                        | 442                        | 405                                        |
| 12325.fa       | 187.19          | 1,8                                        | 278                        | 25                                         |
| 12325.mo       | 191.56          | 1,9                                        | 264                        | 17                                         |
| 12325.p1       | 186.15          | 1,8                                        | 246                        | 20                                         |
| 12499.fa       | 208.22          | 1,11                                       | 175                        | 32                                         |
| 12499.mo       | 216.96          | 1,12                                       | 189                        | 33                                         |
| 12499.p1       | 198.22          | 1,9                                        | 168                        | 41                                         |
| 12575.fa       | 200.10          | 1,10                                       | 121                        | 15                                         |
| 12575.mo       | 188.44          | 1,8                                        | 237                        | 24                                         |
| 12575.p1       | 198.22          | 1,9                                        | 148                        | 23                                         |
| 12647.fa       | 305.46          | 2,7                                        | 82                         | 7                                          |
| 12647.mo       | 318.99          | 2,9                                        | 108                        | 14                                         |
| 12647.p1       | 179.69          | 1,7                                        | 301                        | 24                                         |
| 12680.fa       | 319.82          | 2,9                                        | 79                         | 4                                          |
| 12680.mo       | 313.79          | 2,9                                        | 88                         | 8                                          |
| 12680.p1       | 307.75          | 2,8                                        | 92                         | 7                                          |
| 12681.fa       | 194.06          | 1,9                                        | 198                        | 27                                         |
| 12681.mo       | 191.98          | 1,9                                        | 265                        | 34                                         |
| 12681.p1       | 186.36          | 1,8                                        | 179                        | 22                                         |
| 12817.fa       | 77.04           | 1,1                                        | 217                        | 15                                         |
| 12817.mo       | 103.69          | 1,1                                        | 252                        | 20                                         |
| 12817.p1       | 116.81          | 1,1                                        | 285                        | 23                                         |
| 12974.fa       | 159.50          | 1,4                                        | 139                        | 16                                         |
| 12974.mo       | 154.50          | 1,4                                        | 132                        | 13                                         |
| 12974.p1       | 208.01          | 1,11                                       | 106                        | 12                                         |
| 13095.fa       | 192.39          | 1,9                                        | 130                        | 20                                         |
| 13095.mo       | 198.64          | 1,9                                        | 151                        | 15                                         |

|             |        |      |       |      |
|-------------|--------|------|-------|------|
| 13095.pl    | 208.01 | 1,11 | 109   | 9    |
| 13253.mo    | 217.59 | 1,12 | 117   | 10   |
| 13253.fa    | 143.88 | 1,6  | 106   | 16   |
| 13253.pl    | 188.85 | 1,8  | 122   | 11   |
| 13284.mo    | 437.68 | 3,9  | 85    | 41   |
| 13284.fa    | 276.31 | 2,4  | 164   | 75   |
| 13284.pl    | 232.88 | 1,14 | 276   | 29   |
| 13683.mo    | 180.53 | 1,7  | 176   | 11   |
| 13683.fa    | 175.53 | 1,6  | 241   | 14   |
| 13683.pl    | 149.29 | 1,3  | 362   | 16   |
| 13466.mo    | 319.62 | 2,9  | 112   | 189  |
| 13466.fa    | 337.94 | 2,12 | 84    | 18   |
| 13466.pl    | 195.73 | 1,9  | 355   | 629  |
| 13708.fa    | 168.24 | 1,6  | 199   | 27   |
| 13708.mo    | 166.16 | 1,5  | 254   | 25   |
| 13708.pl    | 193.23 | 1,9  | 135   | 16   |
| SAGE4022.mo | 117.23 | 1,1  | 277   | 22   |
| SAGE4022.fa | 110.15 | 1,1  | 243   | 19   |
| SAGE4022.pl | 73.29  | 1,1  | 196   | 18   |
| 13970.mo    | 171.57 | 1,6  | 109   | 15   |
| 13970.fa    | 179.07 | 1,7  | 128   | 10   |
| 13970.pl    | 110.56 | 1,1  | 270   | 18   |
| AVERAGE     | 200.94 | 1,10 | 190.9 | 56.8 |

**Supplementary Table 5: SPLITREAD Validation from Autism Trios**

| Sample   | Gene            | Event     | Size | Sequence     | Chromosome | Start     | End       | Perfect Support | Unbalanced Support | Status                   |
|----------|-----------------|-----------|------|--------------|------------|-----------|-----------|-----------------|--------------------|--------------------------|
| 11048.p1 | <i>CL6orf84</i> | Deletion  | 6    | TGGGTG       | chr16      | 87308139  | 87308145  | 2               | 1                  | False Pos.               |
| 12575.p1 | <i>ANKRD10</i>  | Deletion  | 3    | TCT          | chr13      | 110330243 | 110330246 | 6               | 7                  | Confirmed inherited      |
| 12575.p1 | <i>MIPOL1</i>   | Insertion | 1    | A            | chr14      | 37085933  | 37085934  | 8               | 12                 | Confirmed inherited      |
| 12681.p1 | <i>WNT16</i>    | Insertion | 4    | CCCA         | chr7       | 120752702 | 120752706 | 7               | 11                 | Confirmed inherited      |
| 12817.p1 | <i>TMEM165</i>  | Deletion  | 2    | AA           | chr4       | 55986377  | 55986379  | 3               | 14                 | Confirmed inherited      |
| 12817.p1 | <i>TMPRSS3</i>  | Insertion | 2    | CC           | chr21      | 42676377  | 42676379  | 6               | 1                  | Confirmed inherited      |
| 13253.p1 | <i>TRPM3</i>    | Insertion | 1    | A            | chr9       | 72647871  | 72647872  | 6               | 1                  | Confirmed inherited      |
| 13253.p1 | <i>SHROOM4</i>  | Insertion | 12   | GCTGTTGCTGCT | chrX       | 50367502  | 50367514  | 4               | 0                  | Confirmed inherited      |
| 13284.p1 | <i>MS4A14</i>   | Deletion  | 2    | TG           | chr11      | 59921931  | 59921933  | 8               | 14                 | Confirmed inherited      |
| 13284.p1 | <i>PRKCSH</i>   | Deletion  | 3    | AGG          | chr19      | 11419365  | 11419368  | 6               | 5                  | Confirmed inherited      |
| 13284.p1 | <i>FOXPI</i>    | Deletion  | 1    | C            | chr3       | 71104272  | 71104273  | 1               | 16                 | False Pos.               |
| 12817.p1 | <i>FOXPI</i>    | Insertion | 1    | T            | chr3       | 71132860  | 71132861  | 1               | 8                  | Confirmed <i>de novo</i> |

Events were selected for validation because they were predicted as *de novo*.

Supplementary Table 6: Copy-number polymorphic processed pseudogenes

| Chrom        | Start           | End             | Prediction | Gene                    | Sample ID      | Processed product size | Genomic product size | PCR | GRCb37 | Frequency** | Location of Insertion Site***                                                  |
|--------------|-----------------|-----------------|------------|-------------------------|----------------|------------------------|----------------------|-----|--------|-------------|--------------------------------------------------------------------------------|
| chr11        | 123625829       | 123640235       | DEL        | <i>OR8G1</i>            | NA18517        | 200                    | 13639                | -   | -      | 0.03        | NA                                                                             |
| chr12        | 54956248        | 54962472        | DEL        | <i>CS</i>               | NA12892        | 231                    | 6500                 | +   | +      | 0.72        | chr19:18002321-18005644                                                        |
| <b>chr12</b> | <b>62465118</b> | <b>62482136</b> | <b>DEL</b> | <b><i>TMEM5</i></b>     | <b>NA19238</b> | <b>339</b>             | <b>17357</b>         | +   | -      | <b>0.03</b> | chr11:66956724-66956756(8 OEA support)                                         |
| chr12        | 11311591        | 11311718        | DEL        | <i>PRB3</i>             | NA12891        | 868                    | 1721                 | -   | -      | 0.03        | NA                                                                             |
| <b>chr13</b> | <b>20632128</b> | <b>20633930</b> | <b>DEL</b> | <b><i>C13orf3</i> *</b> | <b>NA18956</b> | <b>133</b>             | <b>1935</b>          | +   | -      | <b>0.18</b> | chr15:93975222-93975277(3 OEA Support)                                         |
| <b>chr13</b> | <b>20640541</b> | <b>20644480</b> | <b>DEL</b> | <b><i>C13ofr3</i> *</b> | <b>NA15510</b> | <b>333</b>             | <b>4272</b>          | +   | -      | <b>0.18</b> | chr15:93975222-93975277(3 OEA Support)                                         |
| <b>chr18</b> | <b>74957635</b> | <b>74971340</b> | <b>DEL</b> | <b><i>ATP9B</i></b>     | <b>NA19238</b> | <b>243</b>             | <b>13948</b>         | +   | -      | <b>0.03</b> | chr5:5311964-5311998(4 OEA Support)                                            |
| chr19        | 1562849         | 1566284         | DEL        | <i>TCF3</i>             | NA12878        | 392                    | 3243                 | -   | +      | 0.28        | chr9:5100884-5103421                                                           |
| chr2         | 227902745       | 227903587       | DEL        | <i>MFF</i>              | NA19238        | 338                    | 1180                 | +   | +      | 0.03        | chr5:149291121-149292733;<br>chrX:45475129-45476869;<br>chr1:15390840-15392208 |
| chr2         | 179014678       | 179016240       | DEL        | <i>PRKRA/PACT</i>       | NA18956        | 135                    | 1697                 | -   | +      | 0.33        | GRCh37-<br>chr6_ssto_hap7:3929822-3931383;<br>chr6_mann_hap4:3945933-3947494   |

|       |           |           |     |                 |         |     |      |   |   |      |                                                                                                                                                           |
|-------|-----------|-----------|-----|-----------------|---------|-----|------|---|---|------|-----------------------------------------------------------------------------------------------------------------------------------------------------------|
| chr20 | 3684250   | 3687183   | DEL | <i>C20orf27</i> | NA18507 | 209 | 3137 | + | + | 0.03 | GRCh37-<br>chr12:49193784-<br>49194998;<br>chr16:30831842-<br>30833511<br>chrX:135757222-<br>135757870;                                                   |
| chr4  | 12979377  | 12987271  | DEL | <i>RAB28</i>    | NA18555 | 100 | 6684 | - | + | 0.03 | chr9:46758141-<br>46759019<br>chr1:212722185-<br>212723452;<br>chr12:12495380-<br>12496796;<br>chr6:24858504-<br>24859814<br>chr18:52965372-<br>52966824; |
| chr5  | 115258757 | 115266483 | DEL | <i>AP3S1</i>    | NA12891 | 143 | 7869 | + | + | 0.69 | chr18:5121192-<br>5123258;<br>chr18:3405055-<br>3406609<br>chr18:52965372-<br>52966824;                                                                   |
| chr5  | 172967904 | 172968849 | DEL | <i>FAM44B*</i>  | NA19238 | 306 | 1251 | + | + | 0.08 | chr18:5121192-<br>5123258;<br>chr18:3405055-<br>3406609<br>chr18:52965372-<br>52966824;                                                                   |
| chr5  | 172969042 | 172972738 | DEL | <i>FAM44B *</i> | NA18517 | 261 | 3959 | + | + | 0.08 | chr18:5121192-<br>5123258;<br>chr18:3405055-<br>3406609<br>NA                                                                                             |
| chr6  | 31713081  | 31713202  | DEL | <i>BAT2</i>     | NA18956 | 221 | 342  | - | - | 0.03 | chr5:110309875-<br>110314622                                                                                                                              |
| chr6  | 136632446 | 136634828 | DEL | <i>BCLAF1</i>   | NA18555 | 101 | 1247 | - | - | 0.72 | chr6:167032839-<br>167036566                                                                                                                              |
| chr7  | 23318993  | 23319666  | DEL | <i>IGF2BP3</i>  | NA12891 | 114 | 791  | + | + | 0.72 | GRCh37-<br>chr15:93276846-<br>93277506                                                                                                                    |
| chr7  | 44840688  | 44841654  | DEL | <i>H2AFV</i>    | NA12892 | 244 | 917  | + | + | 0.64 |                                                                                                                                                           |

|      |           |           |     |                  |         |     |       |   |   |      |                                          |
|------|-----------|-----------|-----|------------------|---------|-----|-------|---|---|------|------------------------------------------|
| chr8 | 30040974  | 30043048  | DEL | <i>TMEM66</i> *  | NA12891 | 189 | 2190  | + | - | 0.05 | chr5:120678054-120678073(6 OEA Support)  |
| chr8 | 30043198  | 30043835  | DEL | <i>TMEM66</i> *  | NA12891 | 219 | 856   | + | - | 0.05 | chr5:120678054-120678073(6 OEA Support)  |
| chr9 | 19060300  | 19066601  | DEL | <i>FAM29A</i>    | NA19238 | 115 | 6416  | + | + | 0.72 | chr7:53222325-53902081                   |
| chr9 | 107523826 | 107524638 | DEL | <i>TMEM38B</i> * | NA15510 | 200 | 1012  | + | - | 0.03 | chr3:177314857-177314889(41 OEA Support) |
| chr9 | 107496875 | 107507699 | DEL | <i>TMEM38B</i> * | NA15510 | 220 | 11044 | - | - | 0.03 | chr3:177314857-177314889(41 OEA Support) |
| chrX | 56312648  | 56313340  | DEL | <i>KLF8</i>      | NA19240 | 242 | 934   | - | - | 0.03 | NA                                       |

Processed pseudogenes initially predicted as deletion events that precisely remove an intron flanked by the coding region; discovery based on analysis of 11 exomes

\*multiple events from same gene likely correspond to the same processed pseudogene; \*\*Allele frequency determined based on analysis of 51 unrelated exomes; PCR product consistent with processed pseudogene \*\*\*If the processed pseudogene is in the reference the location in the reference (build 36 or GRCh37) is given. If it is not in the reference, the insertion location is based on the map locations of one end anchored reads from the first processed exon.

## Supplementary Note

### Table of Contents

|                                                               |    |
|---------------------------------------------------------------|----|
| Supplementary Note.....                                       | 1  |
| INTRODUCTION .....                                            | 2  |
| METHODS .....                                                 | 2  |
| Algorithm Notation .....                                      | 2  |
| Mapping and Breakpoint Detection .....                        | 3  |
| Split-Read Definition .....                                   | 3  |
| Split-Read Clustering .....                                   | 4  |
| INDEL and SV Detection with Set Cover Approximation .....     | 5  |
| Trio-Aware Read-Depth Filter for SV and INDEL Detection ..... | 6  |
| Repeat Element Insertion Discovery Using Split-Reads .....    | 7  |
| Sensitivity and Specificity of SPLITREAD.....                 | 8  |
| Samples .....                                                 | 9  |
| Application of SPLITREAD to Whole-Genome Datasets.....        | 10 |
| Reference Sequences.....                                      | 12 |
| Comparison to Other Methods .....                             | 12 |
| SPLITREAD Program .....                                       | 13 |
| PCR Validation of Processed Pseudogenes.....                  | 15 |
| REFERENCES.....                                               | 17 |

## INTRODUCTION

Next-generation sequencing technologies have launched a new era in human genetics with a wide range of possibilities for studies of human disease, evolution, and diversity. It is important to routinely and efficiently detect the full spectrum of genetic variation present in any given genome<sup>1</sup>. This includes single nucleotide polymorphisms (SNPs), small insertions and deletions (INDELs)<sup>2</sup> and larger structural variants (SVs)<sup>3,4</sup> (operationally distinguished from INDELs as events >50 bp in length)<sup>5</sup>. Despite the fact INDELs and SVs contribute significantly to human genetic variation, these forms have been more difficult to detect.

Several algorithms have recently been developed for detecting SVs and INDELs using massively parallel sequencing (MPS) technology. Read mapping methods may be generally classified into three major categories: (i) Read-pair (RP) methods infer variants based on discordancies in the distance and orientation of mate pairs mapped to the reference genome; (ii) read-depth (RD) methods infer copy-number differences based on excess or dearth in the number of reads that map to a given region; while (iii) split-read (SR) methods aim to identify SV breakpoints based on a disruption of sequence alignment continuity between a reference and test genome<sup>6</sup>.

Most methods have been designed to handle whole-genome sequencing datasets. Split-read approaches such as Pindel<sup>7</sup>, for example, have contributed a large fraction of the INDELs and SVs to the call set from the 1000 Genomes Pilot study. These methods were largely restricted to unique mappings of whole-genome sequencing data. Here, we detail a general combinatorial algorithm (SPLITREAD) and validate its utility to discover INDELs and SVs in exome datasets.

## METHODS

### Algorithm Notation

We define the set of paired-end reads of the sequenced donor genome as  $R = (pe_1, pe_2, \dots, pe_n)$ . Each paired-end read  $pe_k$  is composed of two mate-pair reads and we denote  $pe_k = (R^k_1, R^k_2)$ . Each read pair can be mapped to multiple locations on the reference genome. The set of alignments for a paired-end read is represented as  $Al(pe_k) = (A^k_1, A^k_2, \dots, A^k_m)$  where  $A^k_m$  corresponds to a vector of positions and orientations:  $A^k_m = [loc(R^k_1), or(R^k_1), loc(R^k_2), or(R^k_2)]_m$ . We distinguish six different types of read-pair placements: two by length (concordant or discordant), three by orientation (direct, everted or inverted), and one by chromosomal location (transchromosomal)<sup>8</sup>. For each read pair, a read-depth value is defined for each nucleotide in the reference genome. The read-depth of each base pair  $i$  on the reference genome,  $RD(i)$ , is defined as the number of the reads that spans this base pair. One-end anchored reads, represented as OEA, are defined as paired-end reads where only one end can be mapped to the reference genome<sup>3,9,10</sup>. OEA reads can also be mapped to multiple locations in the reference genome using the same notation defined above where either the location or orientation value is null. The main assumption of our structural variation detection method is that the unmapped reads of the OEA paired-end reads correspond to the regions harboring insertion/deletion (INDEL) or structural variant (SV) breakpoints. Given an OEA paired-end read  $pe_k$ , without the loss of generality, we assume that  $R^k_2$  cannot be mapped to the reference genome within defined error threshold. This unmapped read with length  $L$  can be represented as a paired-end read that is split into two subsequences at breakpoint  $i$ ,  $sr(R^k_2, i) = (R^k_2[1:i], R^k_2[i+1:L])$  (Figure 1 in main text). All possible locations of the split-read  $sr(R^k_2, i)$  are represented similarly as  $Al(sr(R^k_2, i))$ .

## Mapping and Breakpoint Detection

The set of paired-end reads from the donor exome or genome are mapped to the reference genome using mrsFAST<sup>11</sup>. mrsFAST is a seed-and-extend type algorithm that maps a given read to the reference genome within a small number of errors. mrsFAST reports all possible locations in the reference genome that the given read can be mapped to within the given error threshold.

There are two popular metrics of specifying an alignment error: (i) Hamming distance<sup>12</sup> (number of mismatches between two equal length sequences without any gaps) and (ii) edit distance (minimum number of substitution, deletion and insertion operations to transform one sequence to the other). We used the Hamming distance as our error metric. For detecting insertions and deletions by a split-read approach without limiting detectable INDEL size, it is of utmost importance to use the Hamming distance for read mapping for the following reason. Given two sequences  $S$  and  $R$  with the same length  $|S| = |R| = l$ , the Hamming distance is defined as the total number of positions  $j$ , such that  $S[j] \neq R[j]$ . Assume that we have two similar sequences  $S = \text{"AGATCCTAGC"}$  and  $R = \text{"AGATGCTAGC"}$  where Hamming distance between these two sequences  $HD(S,R) = 1$ . After an insertion of a nucleotide, G after position 4 in sequence  $S$ , it converts into  $\text{"AGATGCCTAGC"}$  where  $HD(S,R)$  becomes 4 due to the frameshift after the insertion. Any SV in the form of an insertion or deletion causes extreme changes in the sequence content, which can be captured quite accurately using the Hamming distance criteria. Using Hamming distance ensures that the reads containing breakpoints of the deletions and insertions cannot map to the reference genome within the acceptable error threshold. As a result, the reads that contain insertions and deletions and do not map to the reference end up as OEA reads, and regardless of the event type, at the site of the event there will be a reduction in the number of reads mapping. Another advantage of Hamming distance is the computational efficiency. Optimal Hamming distance can be computed in linear time  $O(l)$  with respect to the read length  $l$ , whereas optimal edit distance can be computed in polynomial time  $O(l^2)$ .

We map paired-end reads to the reference genome via the Hamming distance criteria using mrsFAST requiring  $\geq 94\%$  sequence identity in single-end mode. We then process all alignments to match the locations of paired-end reads and keep track of all possible concordant and discordant mappings. In the absence of these events, SPLITREAD reports all possible inverted, everted and transchromosomal mappings. Next, we calculate the read-depth of each base pair. Paired-end reads where only one end can be mapped to the reference genome—OEA reads—are identified from the remaining paired-end reads. As described previously, this guarantees that OEA reads indicate SVs, including deletions and insertions. After determining our candidate set for detecting the breakpoints for insertions and deletions, we aim to split the unmapped ends of these reads and map to the reference genome within a certain Hamming distance threshold ( $\sim 6\%$  of read length).

## Split-Read Definition

We described in the previous section that the unmapped read of the OEA pairs corresponds to the reads that span a simple breakpoint of insertions and deletions and thus cannot be mapped to the reference genome in full length under the Hamming distance metric. If we can correctly identify the breakpoint of these events, we can split the OEA reads from the preprocessing step into two subsequences that will map precisely to the reference genome (Figure 1). We defined these two subsequences as split-reads.

We distinguish two types of split-reads: i) A balanced split is one in which the unmapped read decomposes into two subsequences of equal length, and ii) an unbalanced split partitions into subsequences of unequal length.

However, it is computationally infeasible to test for each possible split for an unmapped read that requires alignments proportional to the length of the read. Regardless of the breakpoint location, we note that for an unmapped OEA read with a given length  $L$ , there always exists a subsequence with length equal to or larger than  $L/2$  (pigeonhole principle). Assuming each short read can contain one insertion or deletion event and the distribution of the breakpoints are uniform within read, the worst case is the split is in the middle of the read and there are two subsequences of length  $L/2$ . If the breakpoint is not in the middle, there will be at least one subsequence after the split with length  $>L/2$ . We can take advantage of this simple observation for detecting SVs. Given an OEA  $pe_k$ , where  $R^k_2$  is unmapped and  $|R^k_2| = L$ , we define a split-read as  $sr(R^k_2, L/2) = (R^k_2[1:L/2], R^k_2[L/2+1:L])$ . If there is an insertion or deletion event spanning this read, at least one of these split-reads is going to map to the reference. This significantly eliminates the number of the alignments we have to examine. If we assume the split-reads as paired-end reads, a split-read with insert size 0 corresponds to a read with no SVs in it and is defined as a concordant mapping of the split-reads. All discordant mappings and OEA mappings of the split-reads indicate a structural variation. Because Hamming distance estimates are used, our approach is sensitive to even insertions and deletions with size 1.

In the case of a deletion, the distance between the split subsequences corresponds to the size of the deletion event. In the case of an insertion, the location will be flanked by the OEA mappings of the split-reads. In the case of repeat expansions (microsatellites, etc.), the mappings of split-reads may overlap. By transforming the unmapped mates of the OEA pairs into split-reads—paired-end reads with half of the original length, we can efficiently map these sequences back to the reference using mrsFAST. The main problem with this approach is that split-reads are shorter than the original read and can be mapped to multiple locations in the reference genome. Notice that split-reads consistent with a single variation in the form of an insertion or deletion will map to the exact same location on the reference genome when they traverse or split across a breakpoint. We can identify real insertions and deletions by solving the problem through clustering split-read mappings that support the same variation.

## Split-Read Clustering

We also map split-reads using mrsFAST with a Hamming distance threshold at half of the initial mismatch threshold. All possible mappings of the splits are reported where there is a proper anchored read (under the assumption that the insert size between the anchored read and the split-read is within 3 standard deviations of the initial distribution). For exome data, the insert size distribution is usually dictated by the size distribution of the exons. After the capture process, no size selection is applied in exome resequencing, thus the distribution is wider compared to a Gaussian distribution usually with a maximum threshold of 300 bp. Since OEA reads are only small subset of the total paired-end read set, the running time for the split-read mapping is significantly faster than the initial mapping.

Here, we formally describe an algorithm to identify clusters of the split-read mappings where each cluster supports a certain insertion or deletion event. For each split-read,  $sr(R^k_2, L/2)$  is represented similarly as  $Al(sr(R^k_2, L/2)) = (al^{sr-k}_1, al^{sr-k}_2, \dots, al^{sr-k}_m)$ . Each alignment  $al^{sr-k}_j$  is defined as  $(loc(sr_k), or(sr_k), loc(pe^F_k), or(pe^F_k), loc(pe^R_k), or(pe^R_k))_i$ . Given the set of split-read mappings, a minimum number of clusters are determined where at least one balanced split supports the insertion or deletion

event. Balanced splits can map to different locations and the same balanced split can represent multiple events. For duplicated regions and simple repeat regions, balanced splits that support the same event can map to slightly different locations. These balanced splits are also clustered together to the left-most mapping position. Given the two balanced alignments,  $al^{sr-k}_i$  and  $al^{sr-m}_j$ , where the split mapping overlaps with each other, the sequences of  $Ref[loc(pe^F_k)_i+1, loc(pe^R_k)_i-1]$  and  $Ref[loc(pe^F_m)_i+1, loc(pe^R_m)_i-1]$  are inspected in cyclic fashion. If two sequences are similar, these balanced splits are assigned to the same event, which is the left-most location. Each cluster is represented as  $clu_i = (loc\_start, loc\_end)$ .

OEA split-reads are inserted into this initial clustering  $clu_i$  according to the following rules:

- OEA split-read with alignment  $(loc(sr_k), or(sr_k), loc(pe^F_k), or(pe^F_k), loc(pe^R_k), or(pe^R_k))_i$  where  $loc(pe^F_k) < start\_loc$  or  $loc(pe^R_k) > end\_loc$ . This criterion guarantees that the OEA split-read can be used as evidence of the corresponding event.
- $|loc(r_k) - loc(pe^F_k)| < \text{average insert size} + 3X \text{ standard deviations}$ . This guarantees that the split-read maps to the anchored read concordantly.
- The sequence of the remaining split matches to the reference with respect to the insertion or deletion event.

OEA split-read mappings are assigned to any cluster that satisfies the above constraints. Each split-read pair can be mapped to multiple clusters indicating different events in the reference. The remaining set of OEA split-pairs are clustered together based on their orientation, which corresponds to the insertion of retrotransposons. Notice that the search space for OEA split-reads is limited by the balanced splits. Due to limited search space, the performance of the algorithm for cluster generation is efficient in practice.

## INDEL and SV Detection with Set Cover Approximation

Each cluster  $clu_i$  is associated with a set of OEA split-reads  $(SR^i_1, SR^i_k, SR^i_j, \dots, SR^i_m)$ . We define the detection of the structural variation as selecting a set of clusters such that the majority of the split-read mappings can be explained. We define the structural variation detection problem as the computation of the minimum number of clusters such that all split-reads are assigned to a unique cluster and the total number of the support for each cluster is maximized. Each cluster can be defined as a set of unique split-reads and the cost of the set is defined as a function of the number of elements in the set. It is possible to use any type of function, and in our method, we use the number of elements as the cost. This problem is equivalent to the weighted set cover problem for which a simple greedy algorithm provides an  $O(\log n)$  approximation<sup>13</sup>. The greedy algorithm works iteratively: at each iteration it simply selects a set where the cost per uncovered element is minimal. After selecting the best set, all the split-reads that belong to the selected set are removed from the remaining sets. The costs are updated after the removal of the optimal set and iterated over the remaining sets. The algorithm terminates when all split-reads are covered. SVs or INDELs represented by these clusters are reported with their support value and the actual reads that map to their correct location in the reference genome. The main advantage of this framework is that the cost function can be defined in different ways. An alternative cost function can be defined as a combination of the split-read support and the read-depth.

## Trio-Aware Read-Depth Filter for SV and INDEL Detection

As described previously, SV and INDEL events may radically alter the number of reads mapping to the breakpoints of the event when Hamming distance is used. Although the read-depth is quite uniform for the whole-genome sequencing, there are major problems for using read-depth in exome sequencing due to variability in capture efficiency at the edges of the coding regions and the non-uniform distribution of the read-depth over the exons. Read-depth is usually distributed as a Gaussian distribution over the coding region and two-copy exons do not necessarily have the same read-depth due to different capture efficiencies. However, given a set of exomes, it is possible to use the read-depth information for verifying the insertions and deletions—the simplest case being the trio exome sequencing data of the father, mother and proband.

Although the read-depth is not distributed uniformly among the coding regions for the capture-based sequencing, there is a good correlation between the read-depth of the same exon between multiple samples. This gives us an opportunity to use the read-depth for detecting an increase or decrease in the copy number of the exons as well as detecting reduction in the read-depth at the breakpoints of the events. *de novo* INDEL detection is one of the most difficult analyses for the sequencing data. There are still numerous challenges for detecting INDELs with the most significant being false positives especially among *de novo* events. The read-depth information may be used as a filter to help eliminate these false positives and inherited events missed in the parents. As described previously, the read-depth at the breakpoints is reduced compared to the reference state.

Given all possible mappings of the exomes of the mother(M), father(F) and proband(P), the read-depth at position  $i$  is represented respectively as  $RD_M(i)$ ,  $RD_F(i)$  and  $RD_P(i)$ . The differences at the coverage of the samples are eliminated by normalizing the read-depth with respect to the proband using the sequence coverage ( $RD'_M(i) = RD_M(i) * Coverage(P) / Coverage(M)$ ; and  $RD'_F(i) = RD_F(i) * Coverage(P) / Coverage(F)$ ). We define the coverage of an exome as the total number of the all possible mappings of the short reads. For an SV/INDEL predicted at position  $i$  with an exome dataset of read length  $l$ , reduction at the read-depth is expected between  $i-l$  and  $i+l$ . We compare the read-depth values for all candidate *de novo* events detected by split-reads in the proband with the parents' read-depth values and identify events that have a reduction compared to both parents. While this simple procedure works for many samples, on occasion we encountered exomes where simple normalization was less effective due to biases at the capture efficiencies. For such samples we developed a second filtering process based on the ratio of the read-depths. We calculated two ratios for parents:  $RD_M(i) / RD_P(i)$  and  $RD_F(i) / RD_P(i)$ . For a true *de novo* event there should be an increase of this ratio near the breakpoint but for false positives this ratio will be constant (Supplementary Note Figure 1). Using the distribution of these two ratios, we identified events that have a local maximum around the event site and a ratio of at least 1.25 times more than the normal flanking regions. Based on these two methods, we eliminated inherited or potential false positives events. Using read-depth methods, it is possible to increase our confidence of the *de novo* candidates and reduce the number of events for validation. The normalization methods for exome sequencing are not available for more specific event detection especially for short variants, but they can be used in conjunction with multiple samples to determine evidence for these events.

The same approach also applies to the whole-genome sequencing, which is continuous and consistent such that the same copy regions have similar read-depth throughout the genome. Given single whole-genome sequencing data, the read-depth distribution within the genome can be used to determine regions with increased or decreased read-depth. Although it is sufficient to use a single genome to

determine read-depth cost, one can apply this method similarly between exomes and genomes.

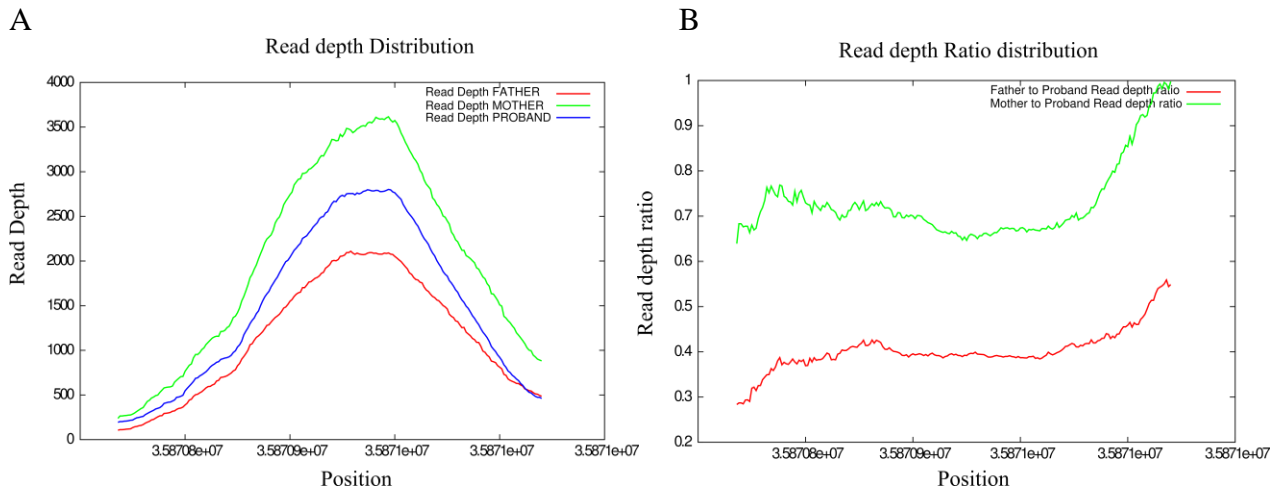

**Supplementary Note Figure 1:** A) The normalized read-depth distribution of trio (11666) exome data around an INDEL event in *CLPS* located at chr6. The figure represents the INDEL (middle position) and 100 bp upstream and downstream of it. B) The ratio of the read-depths of the mother and father with respect to the proband. When the normalization is not sufficient to make a call, we use the ratios. For a real event we expect to see a local maxima at the middle position, which is missing in this case meaning that this event is a false positive call.

### Repeat Element Insertion Discovery Using Split-Reads

The split-read approach may be readily extended to identify common repeat element insertions such as *Alus*, L1s and SVAs. All reads processed in the step above are mapped to the genome or exome where we define an artificial chromosome, chrN, defined in this case as consensus sequences of all common repeat elements. We then track all “transchromosomal” paired-end read mapping where one end maps to a normal chromosome and the other end maps to chrN (Supplementary Note Figure 2) repeat consensus delineating a potential repeat insertion site for the corresponding repeat element<sup>14</sup>. After detecting the INDELs, the remaining reads are searched for such mappings in both initial mapping and the split mappings. The possible insertion sites are clustered based on the breakpoint of the insertion on the reference genome. The minimum number of insertion sites with the maximum support is determined using a similar weighted set cover approximation described in the previous section.

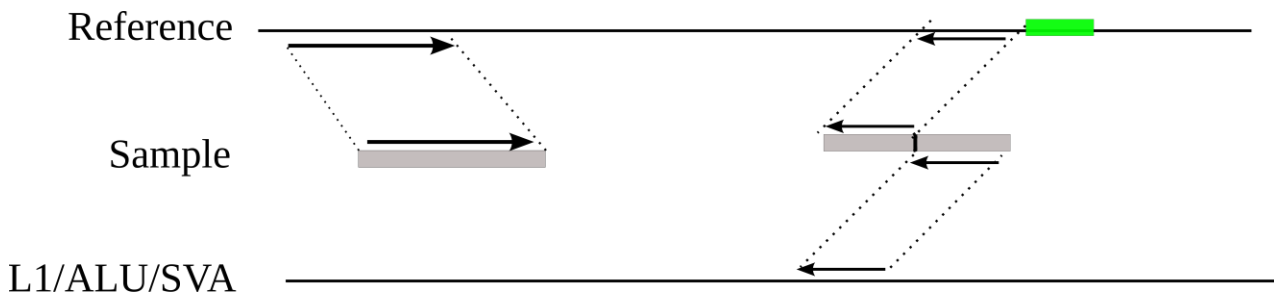

**Supplementary Note Figure 2:** This schematic represents a transchromosomal mapping where one end maps to the reference exome and the other end cannot be mapped to the reference. The unmapped read subsequently split into two sequences where one maps to the reference insertion site and the other end maps to a repeat element implying an insertion of this repeat element to the candidate region represented as green.

## Sensitivity and Specificity of SPLITREAD

The possible alignment of the split-reads to a deletion event can be seen in Supplementary Note Figure 3. The edges of the original full-length reads can be mapped into the event within the Hamming distance limitation  $d$ . This will leave the middle portion of the read as a target region. Given a read with length  $|L|$ , the target region will be of size  $|T| = |L| - 2d$ . The possible mappings of the split-read are shown in Supplementary Note Figure 3. The splits can be mapped perfectly at the center of the split. These splits can also map into the deletion event with  $d/2$  Hamming distance from both sides. This will result in  $d+1$  possible breakpoints in the target region around the center point. Given the target region with size  $|T|$ , there are  $|T|-1$  possible breakpoints for a split to occur. Assuming the distribution of the reads covering the deletion event is uniform, we can safely assume that the possibility of each read split at these positions is the same. Thus, the possibility of a split occurring in the target region is  $(d+1)/(|L|-2d-1)$ .

Note: Each read is generated independent from each other and the probability of the obtaining splits can be represented by a binomial distribution. For an INDEL event the probability of observing at least one balanced split in a region with  $N$  coverage can be calculated using the binomial distribution as  $1 - P(\text{not balanced split})^N$ . For 20X sequence coverage with 76 bp reads and a 4 Hamming distance mapping threshold, the probability of detecting a heterozygous event is dependent on the coverage and at 20X this is only 55% but rises to >90% when the coverage rises to 60X. This sensitivity estimate increases to 79% for homozygous events at 20X, and to 98% at 60X coverage. Such median sequence coverages are not uncommon in many exome sequencing projects and will likely continue to rise as sequencing costs diminish. This probability can be adjusted using different Hamming distance thresholds and different read lengths. The probability of obtaining a balanced split is significantly higher than a random read mapping to the INDEL event and creating a balanced split.

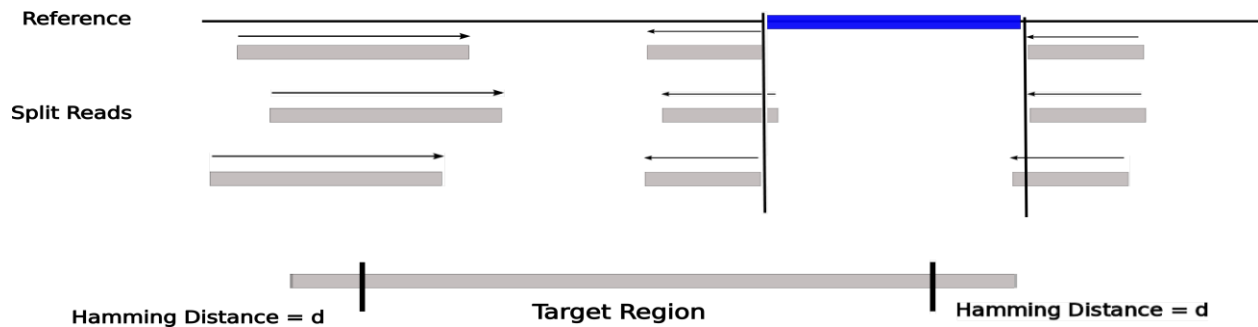

**Supplementary Note Figure 3:** This schematic described the possible mappings of reads to an INDEL with a given Hamming distance threshold of  $d$ . We used this information for estimating our sensitivity for detecting INDELs given the coverage of the region.

Each INDEL/SV detected by the SPLITREAD approach is reported with the number of balanced and unbalanced splits supporting each event. SPLITREAD reports all putative events necessary to reconcile all possible split-reads. False positives, however, occur because of random splits and sequencing errors. In order to establish appropriate thresholds for the number of balanced and unbalanced split-reads, we initially analyzed exome sequence data generated from a single reference sample NA12891 (Supplementary Table 1, Fig. 1), which is a part of the 1000 Genomes Project<sup>5,15</sup>. There is an extensive amount of validated SVs and a well-established INDELs predicted by multiple, different

approaches for NA12891. It is fair to assume these events have a lower false positive rate and can be used to configure our SPLITREAD approach.

We applied SPLITREAD using different threshold values with varying numbers of balanced and unbalanced splits required to support a call. For each configuration, we compare the number of predicted events with the proportion intersecting from the 1000 Genomes Project for sample NA12891 (Figure 2A). Assuming that validated calls from this call set are correct, the slope provides the positive predictive value (PPV) of our method. We maximize the sensitivity (number of events recovered from 1000 Genomes Project) without any loss of specificity by selecting the local maxima of this line. We determine the maximum point as two balanced split-reads and two unbalanced split-reads. This approach aims to determine the ROC curve without using true negatives. To more formally address the threshold issue, we generated an F measure plot (harmonic mean of sensitivity and PPV) which agrees with the previous analysis. As evident from Supplementary Note Figure 4, the optimal threshold value is two balanced split-reads and two unbalanced split-reads.

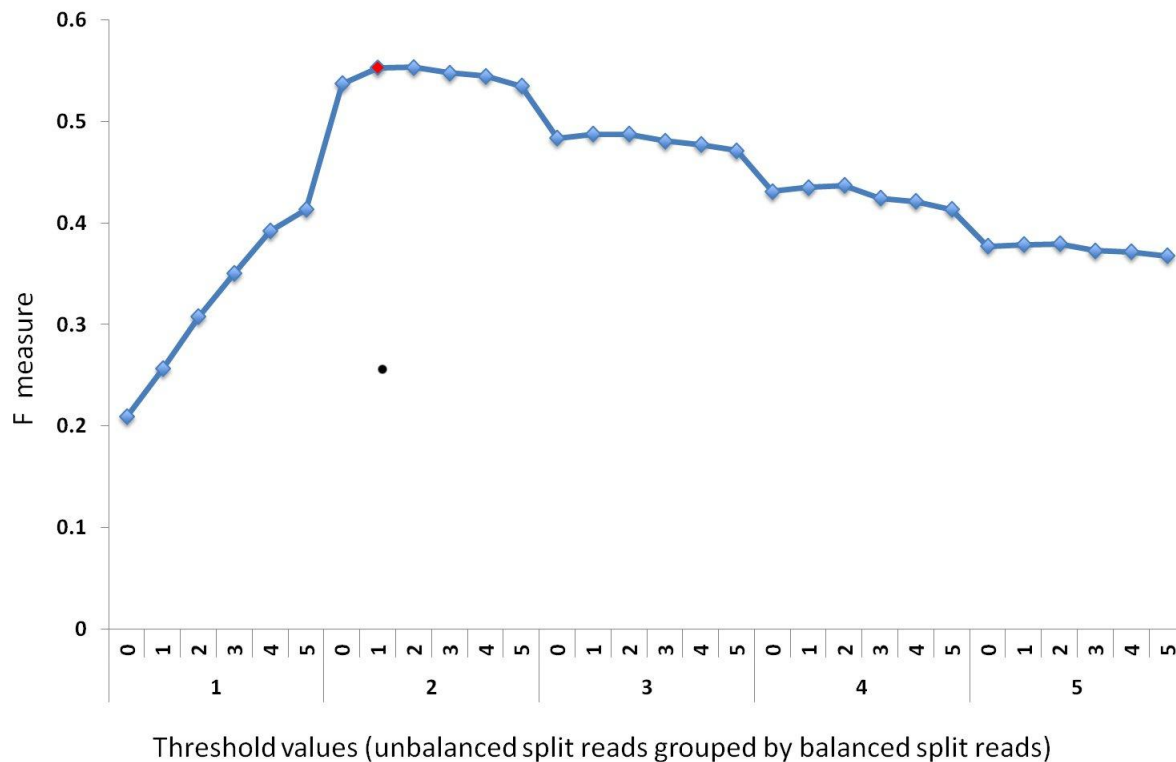

**Supplementary Note Figure 4:** F measure plot to assess sensitivity and specificity of SPLITREAD.

## Samples

We tested the SPLITREAD method on two sample sets: (i) exome sequencing data for 11 HapMap samples and (ii) exome sequencing data for 20 simplex families with children diagnosed with Autism Spectrum Disorder (ASD). The first dataset was generated specifically for this study while the second was published previously.

The first dataset includes 11 HapMap exomes: NA12891, NA12892, NA19238, NA12878, NA15510, NA18507, NA18517, NA18555, NA18956, NA19129 and NA19240. All samples were sequenced

using targeted in-solution capture for protein-coding sequences as described previously<sup>16</sup> (NimbleGen EZ Exome SeqCap v2 spanning 44 Mbp /36.5 Mbp coding region including most RefSeq gene models and several noncoding RNA regions). The post-enrichment libraries for NA12891 and NA12892 were sequenced on Illumina GA2x platform with 76 bp paired-end reads. The remaining samples were sequenced using an Illumina HiSeq platform with 50 bp paired-end reads. We generated, on average, 100 million 50 bp paired-end reads resulting in approximately 60-fold coverage (for NA12891 and NA12892). For the remaining samples, we generated 100 million 50 bp paired-reads with average 113X coverage. ~92% percent of the targeted coding regions are covered with at least 30X coverage. The genomes of all samples (except NA15510) were also sequenced as part of the 1000 Genomes Project<sup>15</sup> and analyzed for INDELs and SVs using numerous mapping and calling algorithms. These genomes are particularly useful for evaluating the performance of our method because most calls from whole-genome shotgun sequence data have been validated by high-density array CGH analysis, PCR and sequence analysis through fosmid end sequence mapping<sup>3</sup>.

The second dataset consists of 20 families where there was a single child with ASD and was obtained primarily from Simon Simplex Collection<sup>16</sup>. All children have a normal sibling and the parents have no indication of ASD. The probands were screened for large CNVs. Exome sequencing was performed separately on each member of the family by subjecting genomic DNA derived from whole blood to in-solution hybrid capture. These samples were captured using NimbleGen EZ Exome SeqCap v1 probes. Captured libraries were sequenced on the Illumina GA2x platform with a target of 76 bp paired-end reads. All samples were sequenced with an average coverage of 200X. ~90% of the primary target was captured with at least 8-fold coverage.

HapMap samples raw sequence data have been deposited into SRA (SRA039053).

## Application of SPLITREAD to Whole-Genome Datasets

To demonstrate its applicability to whole-genome sequence, we performed two additional sets of experiments. First, we tested the efficiency of our method using the genome sequence data from ALS-FTD (amyotrophic lateral sclerosis-frontotemporal dementia) patients recently reported to be associated with 23% of familial ALS and 12% of FTD patients<sup>17</sup>. A region in 9p21 was identified and the majority of the cases were linked to this region. Chromosome 9 was specifically isolated from a patient and sequenced using the Illumina platform with average sequence coverage of 170X. The large GGGGCC repeat expansion in the case sample was missed by the GATK INDEL calling software and the BWA alignment method was not able to map reads at the site of the repeat expansion. The variant was detected only by using a visualization tool that allowed for manual inspection of read mapping. When we apply SPLITREAD, we find that this large repeat expansion is predicted accurately. The split-reads that support the repeat expansion can be seen in Supplementary Note Figure 5. The event is detected using the unbalanced reads, which indicates that the expansion is larger than the read length, 100 bp. Due to the repetitive nature of the region, it is hard to assemble the sequence at the insertion site. However, using the split-reads we were able to detect the extended hexanucleotide repeat motif GGGGCC. The other ends of the reads deteriorate as they enter into the expansion. The average number of the motif detected is three, which corresponds to 18 bp. In order to quantify the amount of the expansion, we chopped the chr9 sequence dataset into 18 bp long subsequences and mapped these back to the insertion site using mrsFAST, which records all possible mappings. As can be seen from the figure, the read-depth at the expansion site indicates a 10-fold increase in the coverage with respect to the reference genome. The 18 bp repeat motif exists only at the insertion site in chr9 so there are no

paralogs that can interfere with the read-depth. Based on read-depth, we estimate at least 30 copies of the hexanucleotide repeat, which is consistent with repeat PCR experiments performed on this case<sup>17</sup>.

In the second experiment we extended our analysis to one of the best characterized genomes (NA12878)<sup>18</sup> from the Pilot 2 project from the 1000 Genomes Project; however, we used a dataset generated by others<sup>18</sup> at a higher coverage with longer read length (101 bp at >80X) from the same genome. We used the INDEL calls and the SV calls from the 1000 Genomes for comparison. There are 328,527 INDELs reported by the 1000 Genomes (that intersect with exons); we were able to detect 60% of them. A total of 427,763 INDELs were predicted by SPLITREAD, where 75% intersect with either 1000 Genomes predictions or dbSNP release 130. Of the remaining events, 15% are predicted to map within segmental duplications, which were generally excluded/filtered by the INDEL callers applied to the 1000 Genomes datasets. To test the accuracy of SVs, we used 1000 Genomes<sup>15</sup>, fosmid end sequence analysis<sup>3</sup>, and CNV datasets generated using an ultra-dense array CGH platform<sup>4</sup>. We detected 42% of 1000 Genomes calls, 15% of the fosmid calls, and 51% of the array CGH calls. We predicted a total of 10,335 SVs where 29% intersect with the combined 1000 Genomes calls, Kidd et al. calls, and Conrad et al. calls. Of SV calls predicted by the SPLITREAD method, 4202 are between 50 bp and 1 kbp. This event range between 50 bp and 1 kbp is underrepresented in the available SV calls in these studies due to the difficult nature of validation. We acknowledge the limitations of our method with respect to coverage and more importantly run time. We estimate a 300-fold increase for whole-genome data compared to exome datasets. Notice that the reference sequence is not repeat masked for read mapping and all possible mappings are considered in our predictions. For whole-genome datasets, a practical implementation may be to consider use of SPLITREAD when all other mapping algorithms have failed to discover the pathogenic variant (as in the case of the ALS example).

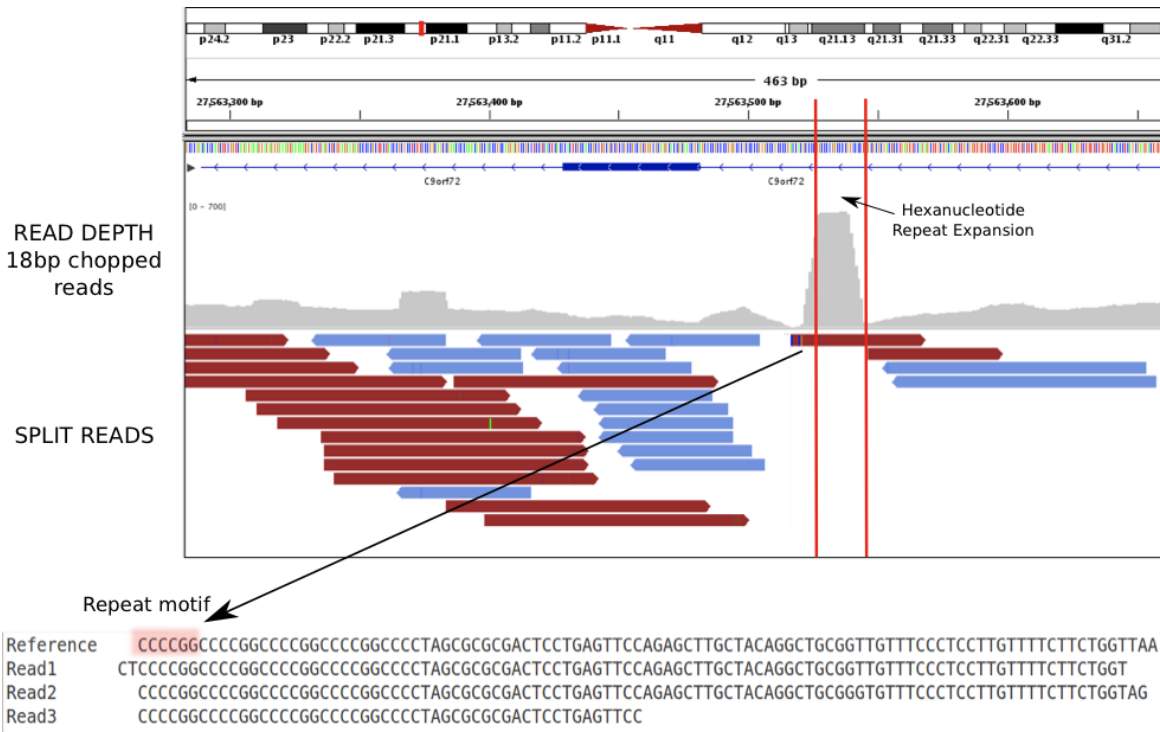

**Supplementary Note Figure 5:** Discovery of a repeat expansion associated with ALS-FTD using SPLITREAD with whole-genome sequence data. Secondary read-depth mapping confirms an increase in read-depth at the junctions predicted by SPLITREAD.

## Reference Sequences

We compared three different references for detecting INDELs ( $\leq 50$  bp) and SVs ( $> 50$  bp). The first reference (RefSeq coding sequence) uses the defined coding sequence and 300 bp flanking sequence. In order to detect putative mobile element insertions, we also included consensus sequences of LINEs, SINEs and SVAs (as defined above). The second reference contains the first reference plus duplicated genes and processed pseudogenes. BLAT sequence similarity searches of RefSeq coding regions (50% score and length threshold) were used to define these. The whole genome (build36) defined the third reference.

## Comparison to Other Methods

We compared our methods with two alternative INDEL detection methods. The first method, Pindel<sup>7</sup>, is a split-based pattern growth approach for detecting the breakpoints of insertion and deletion events using short paired-end data. This method also uses the OEA pairs and is based on the insert size estimating a target alignment region. The unmapped read is aligned to this region, growing patterns from the prefix and suffix of the read. Unlike our method, Pindel computes the exact alignment with the target region and the read. Another important difference is that Pindel requires unique mappings and is not designed to consider highly duplicated regions or low complexity regions. Pindel uses BWA<sup>19</sup> as its mapping method and optimizes mapping to the whole-genome sequence results. For comparisons in this study, we ran Pindel v 0.2.0 using insert size=30, without BreakDancer results, and the maximum event size index set to 5 (8092 bp) as recommended on NCBI human genome reference build36.

We also compared our method to a more general pipeline used for detecting INDELs from exome sequencing data, namely BWA alignments processed with GATK suite<sup>18</sup>. BWA creates a local sequence alignment (pileup), which is processed by GATK for realignment. Corrections of the remaining set are filtered with various filtering options in the GATK suite. This method is limited to small INDELs rarely reporting events  $> 15$ -20 bp in size. GATK 1.0.5299 is used for INDEL calling using UnifiedGenotyper -glm DINDEL option.

The third method we compared our method to was CREST<sup>20</sup>, an algorithm that uses the next-generation sequencing reads with partial alignments to a reference genome to directly map SVs at the nucleotide level of resolution. BWA version 0.5.9-r16 is used and we used the version data 10/15/07 for CAP3 and Standalone BLAT v. 34. CREST is also run on the build36 of the human genome. Similarly, CREST is applied using the exome sequencing data. We further investigated the SVs predicted with CREST and SPLITREAD.

We plotted the predicted SV size between CREST and SPLITREAD and there is a difference in the size of events called as suggested (Supplementary Note Figure 6). We observe that CREST focuses on larger events while SPLITREAD explores a wider spectrum of genetic variation with the bulk of events (similar to the mutational spectrum) occurring within INDEL range. We suspect that the range difference between CREST and SPLITREAD may be due to the nature of exome sequence datasets. The exome data are limited to the coding regions that are, on average, 200 bp in length. The range for possibly mapping these events is short and BWA usually tries to align these small events although they are aligned incorrectly. For small events (INDEL range  $< 50$  bp) BWA does not generate sufficient clipped reads. Due to the nature of the exome data, CREST is limited to detect large events

(Supplementary Note Figure 6). CREST only predicts events for large SVs, whereas SPLITREAD has a wider range. The intersection between the two methods in the large deletions is quite good. Based on the observation on the predictions of these methods using the sample NA12891, we observed that there is not a single method that predicts all the events. Each method complements each other and it is quite important to use different methods together to see the whole range of SVs and INDELs. SPLITREAD adds considerable value in the discovery of underrepresented but biologically important classes of INDELs and structural variation.

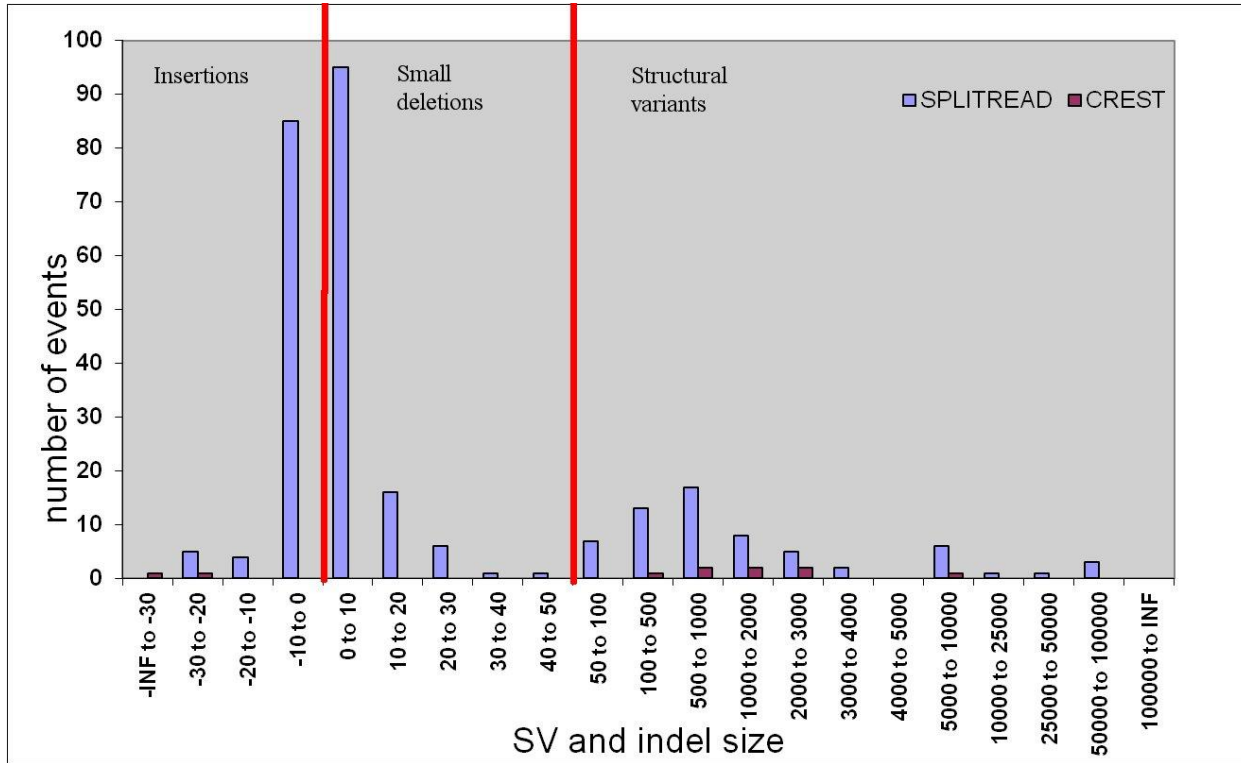

**Supplementary Note Figure 6:** Size spectrum of INDELs and SVs discovered by CREST and SPLITREAD. We observe that CREST detects primarily larger SVs, while SPLITREAD shows a wider range of detection ranging from INDELs to SVs. Here we show only the insertions fully characterized by SPLITREAD (exact breakpoint and the inserted sequence) as opposed to novel insertions detected by OEA strategies of indeterminate size.

## SPLITREAD Program

SPLITREAD is implemented in C (available at <http://splitread.sourceforge.net>) and requires as input paired-end mapping information generated by mrsFAST from underlying raw sequence data (FASTQ format). The current version of SPLITREAD is designed for reads generated by the Illumina platform. It is possible to use other mapping methods that can be set up not to allow insertions and deletions and reporting all possible mapping positions for each read. Standard output includes the base pair resolved location of the insertion/deletion, level of support (number of reads supporting each event), and the total Hamming distance of the read mappings. The deletion events and small insertions are processed first. We can detect any deletion from 1 bp to 10 Mbp. Insertions less than the size of the read are also detected. The remaining reads are used for identifying the insertions and repeat expansions that are larger than the read length. It is possible to use methods such as NovelSeq<sup>10</sup> to identify the insertions using OEA reads around the insertion site. We include the mobile elements (*Alus*, L1s, SVAs and

processed pseudogenes) in our reference, so we can detect these insertions without any size limit. The most important advantage is that our method can handle the events in the low complexity regions or duplicated regions such as segmental duplications. Final call sets can be filtered for the support and Hamming distance adjusted based on exome/genome sequence coverage. SPLITREAD may be used as a standalone program on a single CPU or it can be run on a cluster with multiple nodes. It is possible to generate custom reference sequences for better performance or better sensitivity. The process flowchart of the SPLITREAD method can be seen in Supplementary Note Figure 7.

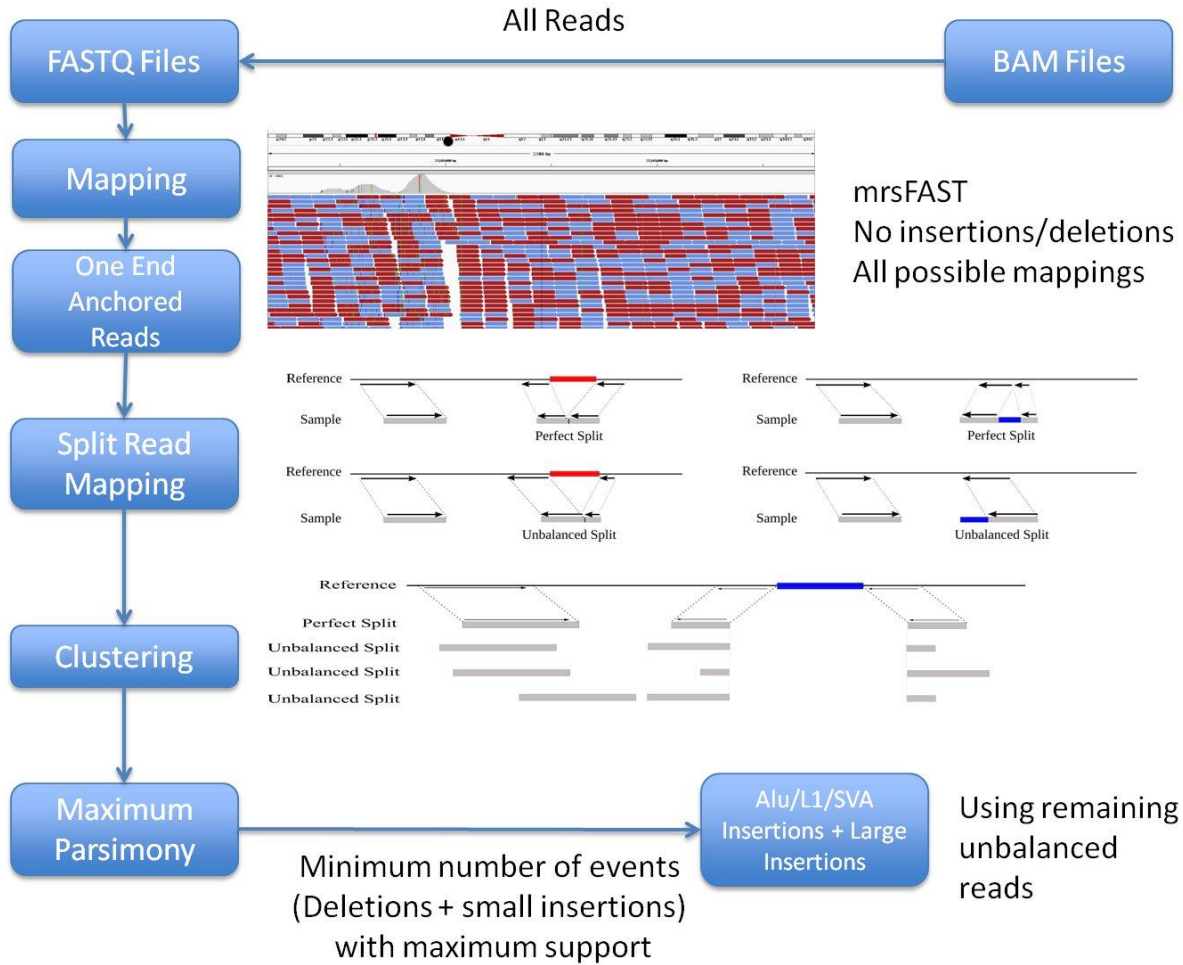

**Supplementary Note Figure 7:** Flowchart for data processing using SPLITREAD.

Many methods for detecting structural variation using high throughput sequencing data are currently available<sup>5,6</sup>. Read-pair (RP) based methods such as VariationHunter<sup>21</sup>, BreakDancer<sup>22</sup> and MoDIL<sup>23</sup> have limited power in analyzing exome sequencing data, and in most cases exact breakpoints cannot be defined. Exome capture protocols typically do not involve size selection and, as a result, cannot capture the smaller structural variants and INDELs due to a wider variance in insert size. SPLITREAD does not depend on the insert size of read pairs for detecting events. Moreover, RP-based methods rely on read pairs that span the event site, yet SPLITREAD depends only on a read traversing the breakpoint and its length for alignment accuracy increasing SV detection sensitivity. There are, however, limitations related to sequence coverage and the properties of the underlying sequence in the breakpoint, as in any sequence analysis algorithm. Another limitation of SPLITREAD is the dependence on a balanced split to seed an event. This is directly dependent upon coverage. Given 76 bp

reads, the chance of detecting a heterozygous event is dependent on the coverage and at 20X this is only 55% but rises to >90% when the coverage rises to 60X. This sensitivity estimate increases to 79% for homozygous events at 20X, and to 98% at 60X coverage. Such median sequence coverages are not uncommon in many exome sequencing projects and will likely continue to rise as sequencing costs diminish. A recently developed method, CREST<sup>20</sup>, is based on local assembly of soft-clipped (partially aligned) reads identified by the BWA<sup>19</sup> mapper, and its performance depends on the read aligner. As described by Wang *et al.*<sup>20</sup>, CREST was not designed for small INDEL detection due to the lack of soft-clipping signatures for events <50 bp. Most SV detection algorithms utilize only uniquely mapped reads, which limits the use in relatively less complex areas of the genome. In contrast, SPLITREAD performs a combinatorial analysis of split-read (SR) alignments, which is tolerant to the alignment errors while still using ambiguously mapping reads. This makes it possible for SPLITREAD to discover INDELs in repeat-rich regions including microsatellites at exact breakpoint resolution, with no theoretical upper or lower bounds on detectable event size.

SPLITREAD can detect insertions and deletions without any size limitation. The size spectrum of the insertions that can be accurately characterized by SPLITREAD is bound by the read length; however, it is possible to detect approximate breakpoints of larger insertions, although the content and the full extent of the inserted sequence will remain unknown. Such larger insertions are detected by identifying clusters of OEA reads<sup>9</sup>; i.e. reads proximal to the insertion locus will map to the forward strand where the distal reads will map to the reverse strand, and the unmapped reads will not be split into two (balanced or unbalanced). Moreover, in the case of an insertion, the distance between the “proximal cluster” and the “distal cluster” will be smaller than the insert size of the library. Note that this “cluster distance” can be much larger for deletions, and the split reads can be detected in both breakpoints of the deletion event, although they do not need to be balanced splits. It is possible to use alternative approaches such as NovelSeq<sup>10</sup> as a post-processing step to fully characterize the larger insertions.

## PCR Validation of Processed Pseudogenes

Pseudogenes were validated using PCR amplification and primers specific to flanking exons of the predicted intronic deletions (Supplementary Note Table 1). Pseudogene presence was tested by amplification only in the HapMap individual in which the deletion was detected using manufacturer’s protocol [PCR Master (Roche)]. For the two genes (*MFF* and *TMEM66*) that were genotyped in multiple HapMap samples, the presence of both the pseudogene and the original gene were detected using long-range PCR amplification following manufacturer’s protocol [Expand Long Template PCR System (Roche)].

For the PCR amplifications using PCR Master (Roche) kit, we performed reactions in 12.5 µl volumes with 1X PCR Mastermix, 20 ng of HapMap DNA, and 0.4 µM of primers. The thermocycler program used is as follows: (1) 94°C for 4:00, (2) 94°C for 0:30, (3) 55°C-58°C for 0:30, (4) 72°C for 1:30, (5) steps 2 through 4 repeated 35 times, and (6) 72°C for 7:00. For the long-range PCR amplifications using Expand Long Template PCR System (Roche), we performed reactions in 15 µl volumes with 1X Expand Long Template buffer 1, 350 µM dNTPs, 20 ng of HapMap DNA, 0.3 µM of primers, and 2.25 U of Expand Long Template Enzyme mix. The thermocycler program used is as follows: (1) 94°C for 2:00, (2) 94°C for 0:10, (3) 55°C-60°C for 0:30, (4) 68°C for 1:30, (5) steps 2 through 4 repeated 10 times, (6) 95°C for 0:15, (7) 55°C-60°C for 0:30, (8) 68°C for 1:30+0:20/cycle, (9) steps 6 through 8 repeated 25 times, and (10) 68°C for 7:00. All primer sequences can be found in the Supplementary Note Table 1.

**Supplementary Note Table 1. Primers used in PCR validation of processed pseudogenes.**

| Chromosome | Start     | End       | Size  | Sample ID | Gene              | Forward                  | Reverse                |
|------------|-----------|-----------|-------|-----------|-------------------|--------------------------|------------------------|
| chr11      | 123625829 | 123640235 | 14406 | NA18517   | <i>OR8G1</i>      | TTGCAGCCATCTTCAATCA      | TCTGCTGCCATTCTTTGATG   |
| chr12      | 11311591  | 11311718  | 127   | NA12891   | <i>PRB3</i>       | TGATTACTGGGGAGGCTGTC     | TGTCAGCCAGGAAGAATCTC   |
| chr12      | 54956248  | 54962472  | 6224  | NA12892   | <i>CS</i>         | TTGCTGCAACACAAGGTAGC     | CAAAAGAGTGGGCAAAGAGG   |
| chr12      | 62465118  | 62482136  | 17018 | NA19238   | <i>TMEM5</i>      | CAGCGATGTGACTGCTCAAT     | TCATTAATCCAGGGGCTGTC   |
| chr13      | 20632128  | 20633930  | 1802  | NA18956   | <i>C13orf3</i>    | GATGGAATTTTCAAACCAGGAG   | CAGAATCCAGGCTCAATGAT   |
| chr13      | 20640541  | 20644480  | 3939  | NA15510   | <i>C13orf3</i>    | CCTGTGGAGGGTTTGGTAGA     | TGGAAAAATCAAGAAGGCATTG |
| chr18      | 74957635  | 74971340  | 13705 | NA19238   | <i>ATP9B</i>      | GAGGATGAGTCTGCGCATTT     | TTCAGGACATCCAAGCCATA   |
| chr19      | 1562849   | 1566284   | 3435  | NA12878   | <i>TCF3</i>       | GCTTTGTCCGACTTGAGGTG     | AGACGAGGACGAGGACGAC    |
| chr2       | 179014678 | 179016240 | 1562  | NA18956   | <i>PRKRA/PACT</i> | TTCTTTTGGCTTGCTTTTT      | TGGCTGGAGACTTCCTGAAT   |
| chr2       | 227902745 | 227903587 | 842   | NA19238   | <i>MFF</i>        | GGAAAAGCAGTGTCCTGTT      | TGGAATCCTTGTTCAGGTC    |
| chr20      | 3684250   | 3687183   | 2933  | NA18507   | <i>C20orf27</i>   | GACATCCTTGCTCAGCCTGT     | GAGTCCGGAGTATCCGCTTT   |
| chr4       | 12979377  | 12987271  | 7894  | NA18555   | <i>RAB28</i>      | TTGATTTTCTTCTCCGGGTA     | GTTGCTGCTGAAATCCTTGG   |
| chr5       | 115258757 | 115266483 | 7726  | NA12891   | <i>AP3SI</i>      | TGAAAATGTCTGTGAGCTGGA    | TTTCCAGCTTATTTTGTGCATC |
| chr5       | 172967904 | 172968849 | 945   | NA19238   | <i>FAM44B</i>     | CCCTGGGTTGCTGTAGTGTT     | CTCCAGCTCCATCTCAGGAC   |
| chr5       | 172969042 | 172972738 | 3696  | NA18517   | <i>FAM44B</i>     | GTCTTGAGATGGAGCTGGAG     | ATCTGGACAAGCAGGAATGG   |
| chr6       | 31713081  | 31713202  | 121   | NA18956   | <i>BAT2</i>       | CACGCCTTCCACCTACAGTG     | GTAGGGGGCAAGAGGAAGTC   |
| chr6       | 136632446 | 136634828 | 2382  | NA18555   | <i>BCLAF1</i>     | TGACCACCTTCTTCCAATGTC    | GACAGCCTCCCCAGTAATCA   |
| chr7       | 23318993  | 23319666  | 673   | NA12891   | <i>IGF2BP3</i>    | CATCAGGTGTCTGGTCACGA     | ATCAGAGTGCCATCCTTTGC   |
| chr7       | 44840688  | 44841654  | 966   | NA12892   | <i>H2AFV</i>      | GGCAAGCATAGAAGTGACCAG    | GCTCAGGGAAGAATTTATGGAA |
| chr8       | 30040974  | 30043048  | 2074  | NA12891   | <i>TMEM66</i>     | CTTTCTACTTTATCGTCTCCTGGT | GGGCTTACTCACCCCTTCAT   |
| chr8       | 30043198  | 30043835  | 637   | NA12891   | <i>TMEM66</i>     | CCTCCATGAAGGGGTGAGTA     | TGGTGCAACTTCTGGTTTTG   |
| chr9       | 19060300  | 19066601  | 6301  | NA19238   | <i>FAM29A</i>     | CACTGTCTCCTCTGCAACCA     | TTTGATCCTGCCTCAGAAGAA  |
| chr9       | 107496875 | 107507699 | 10824 | NA15510   | <i>TMEM38B</i>    | GCCCTCTCCTACTCCTCACC     | AGGATTCTTCCATGCCAATG   |
| chr9       | 107523826 | 107524638 | 812   | NA15510   | <i>TMEM38B</i>    | CAACTACTGGCTTCGGGAAT     | AGCCATTTCATCACCTTCTGG  |
| chrX       | 56312648  | 56313340  | 692   | NA19240   | <i>KLF8</i>       | AAAGTTGACCCACCTCCAT      | ATTCTGCGGTGAGCTTTCAG   |

## REFERENCES

1. Eichler, E.E. Widening the spectrum of human genetic variation. *Nature genetics* **38**, 9-11 (2006).
2. Mills, R.E. *et al.* An initial map of insertion and deletion (INDEL) variation in the human genome. *Genome research* **16**, 1182-1190 (2006).
3. Kidd, J.M. *et al.* Mapping and sequencing of structural variation from eight human genomes. *Nature* **453**, 56-64 (2008).
4. Conrad, D.F. *et al.* Origins and functional impact of copy number variation in the human genome. *Nature* **464**, 704-712 (2010).
5. Mills, R.E. *et al.* Mapping copy number variation at fine scale by population scale genome sequencing. *Nature* **470**, 59-65 (2011).
6. Alkan, C., Coe, B.P. & Eichler, E.E. Genome structural variation discovery and genotyping. *Nature reviews* **12**, 363-376 (2011).
7. Ye, K., Schulz, M.H., Long, Q., Apweiler, R. & Ning, Z. Pindel: a pattern growth approach to detect break points of large deletions and medium sized insertions from paired-end short reads. *Bioinformatics (Oxford, England)* **25**, 2865-2871 (2009).
8. Tuzun, E. *et al.* Fine-scale structural variation of the human genome. *Nature genetics* **37**, 727-732 (2005).
9. Kidd, J.M. *et al.* Characterization of missing human genome sequences and copy-number polymorphic insertions. *Nature methods* **7**, 365-371 (2010).
10. Hajirasouliha, I. *et al.* Detection and characterization of novel sequence insertions using paired-end next-generation sequencing. *Bioinformatics (Oxford, England)* **26**, 1277-1283 (2010).
11. Hach, F. *et al.* mrsFAST: a cache-oblivious algorithm for short-read mapping. *Nature methods* **7**, 576-577 (2010).
12. Hamming, R.W. Error-detecting and error-correcting codes. *Bell System Technical Journal* **29**, 147-160 (1950).
13. Chvatal, V. A Greedy Heuristic for the Set-Covering Problem. *Mathematics of Operations Research* **4**, 233-235 (1979).
14. Hormozdiari, F. *et al.* Next-generation VariationHunter: combinatorial algorithms for transposon insertion discovery. *Bioinformatics (Oxford, England)* **26**, i350-357 (2010).
15. 1000 Genomes Project Consortium. A map of human genome variation from population-scale sequencing. *Nature* **467**, 1061-1073 (2010).
16. O'Roak, B.J. *et al.* Exome sequencing in sporadic autism spectrum disorders identifies severe de novo mutations. *Nature genetics* **43**, 585-589 (2011).
17. Renton, A.E. *et al.* A Hexanucleotide Repeat Expansion in C9ORF72 Is the Cause of Chromosome 9p21-Linked ALS-FTD. *Neuron* (2011).
18. Depristo, M.A. *et al.* A framework for variation discovery and genotyping using next-generation DNA sequencing data. *Nature genetics* **43**, 491-498 (2011).
19. Li, H. & Durbin, R. Fast and accurate short read alignment with Burrows-Wheeler transform. *Bioinformatics (Oxford, England)* **25**, 1754-1760 (2009).
20. Wang, J. *et al.* CREST maps somatic structural variation in cancer genomes with base-pair resolution. *Nature methods* **8**, 652-654 (2011).
21. Hormozdiari, F., Alkan, C., Eichler, E.E. & Sahinalp, S.C. Combinatorial algorithms for structural variation detection in high-throughput sequenced genomes. *Genome research* **19**, 1270-1278 (2009).

22. Chen, K. *et al.* BreakDancer: an algorithm for high-resolution mapping of genomic structural variation. *Nature methods* **6**, 677-681 (2009).
23. Lee, S., Hormozdiari, F., Alkan, C. & Brudno, M. MoDIL: detecting small indels from clone-end sequencing with mixtures of distributions. *Nature methods* **6**, 473-474 (2009).
